# Supplementary material
Source: PubMed Central journal article supplement (PMC6150431)
Supplement: DC180978SupplementaryData2.pdf [file DC180978SupplementaryData2.pdf]

# Fat Shadow Atlas

First Edition

Rasimcan Meral, MD  
Benjamin J. Ryan, PhD  
Noemi Malandrino, MD  
Abdelwahab Jalal, MBBS  
Adam H. Neidert, MS  
Ranganath Muniyappa, MD PhD  
Barış Akıncı, MD  
Jeffrey F. Horowitz, PhD  
Rebecca Brown, MD  
Elif A. Oral, MD

|                                                                       |                |
|-----------------------------------------------------------------------|----------------|
| <b>Preface</b> .....                                                  | <i>Page 2</i>  |
| <b>Units and Abbreviations</b> .....                                  | <i>Page 3</i>  |
| <b>Protocol: Generating a fat shadow image in enCore v14.10</b> ..... | <i>Page 4</i>  |
| <b>Atlas</b> .....                                                    | <i>Page 5</i>  |
| Section 1: Controls.....                                              | <i>Page 5</i>  |
| Section 1a: Female controls.....                                      | <i>Page 5</i>  |
| Section 1b: Male controls.....                                        | <i>Page 10</i> |
| Section 2: Generalized Lipodystrophy.....                             | <i>Page 12</i> |
| Section 3: Familial Partial Lipodystrophy Type 2 (Dunnigan).....      | <i>Page 13</i> |
| Section 4: Other Familial Partial Lipodystrophy types (FPLDX).....    | <i>Page 15</i> |
| Section 5: Acquired Partial Lipodystrophy.....                        | <i>Page 18</i> |
| <b>Appendix</b> .....                                                 | <i>Page 19</i> |
| <b>References</b> .....                                               | <i>Page 24</i> |

## Preface

This Fat Shadow Atlas is developed to provide the entire dataset analyzed in the paper “*Fat Shadows*” from *DXA for the Qualitative Assessment of Lipodystrophy: When a Picture is Worth a Thousand Numbers* by Meral R et al. Some additional pediatric Familial Partial Lipodystrophy (FPLD) patients not included in the study are also presented. We hope that this will serve as a beginning of a global project that will enable the collection and comparison of fat shadows. If any researchers are interested in collaboration and further participation in the atlas, please contact the corresponding author of the manuscript.

This atlas is organized first to provide readers with a protocol to obtain fat shadows with the enCore (v14.10) software to obtain fat shadows from total body composition scans obtained with a GE Lunar (Chicago, IL) Dual Energy X-ray Absorptiometry (DXA) system. Control cases of females and males are presented separately across a continuous spectrum of BMI. The lipodystrophy patients are organized according to subtype and broken into the genotype groupings. The atlas section only labels the gender category and age in years for each subject. In addition, BMI is shown for controls and assigned subgroup for the lipodystrophy patients. More information on each patient can be found in the appendix. As lipodystrophy syndromes are heterogeneous in etiology and presentation, we followed the Online Mendelian Inheritance in Man (OMIM, [www.omim.org](http://www.omim.org)) classification for the subtypes of lipodystrophy based on genetic findings. The most common genetic cause of FPLD was mutations in the Lamin A/C gene (*LMNA*), which causes FPLD type 2 (FPLD2), also known as the Dunnigan variety (1-5). FPLD2 are shown together as a group to demonstrate the typical presentation, as well as the exceptions to the rule (phenotypic heterogeneity in laminopathies (6; 7)). In the last section, all other FPLD subtypes were grouped together as FPLDX, which included FPLD type 1 (FPLD1, Köbberling variety), defined as FPLD with no mutations in confirmed pathogenic genes (8); FPLD3 (due to mutations in Peroxisome Proliferator-Activated Receptor- $\gamma$ , *PPARG* (9)), genetic subtypes not numbered in standard nomenclature, and all patients in whom the variants of unknown significance (VUS) in different genes have not yet been verified.

As more research is done into the molecular pathways of lipodystrophy, additional subtypes are defined, and new subgroups break off from FPLD1. Patients who once fell into the category of FPLD1 may be redefined as another subtype (10-15). In addition, more research may show that some variants which were considered pathogenic at one point are not in reality pathogenic as more functional work is carried out. For example, some *PPARG* variants previously thought to be pathogenic, and thus were classified as FPLD3, do not classify as pathogenic variants according to the recently introduced Missense InTerpretation by Experimental Response (MITER) classifier (16), suggesting that some of these patients may have to be reclassified as FPLD1. We expect that within the FPLD1 population, there will be more subgroups that are yet to be defined, in addition to the classical presentation of FPLD1 described by Köbberling et al (3; 17; 18). The fat shadow method described here may prove useful as a phenotyping tool and help investigators to identify similarities and disparities within the FPLDX population and other subtypes of the diseases.

We are grateful to all patients and controls for their participation in the study, and Lipodystrophy United for their help in patient recruitment into various lipodystrophy trials. We dedicate this paper to those patients whom we have lost since 2009 and especially to Mrs. Natalie K. Hunt-Embry who fought her disease with great courage and passion. We are indebted to Laura Foess-Wood for performing all the DXA scans at the Michigan Clinical Research Unit, and for her positive personality that cheers us up every time we see her. We thank Dr. Kong Y. Chen and Dr. Robert J. Brychta for performing the DXA scans at the Metabolic Clinical Research Unit at the NIDDK. We also acknowledge support from the NIH on grants: R01 DK088114, P30 DK089503, DK034933 which allowed the DXA scans presented here to be performed, and from the Intramural Research Program of the National Institutes of Health, the National Institute of Diabetes and Digestive and Kidney Diseases. BJR was supported by NIH T32 DK007245. Finally, the work was supported by generous gifts to the Lipodystrophy Fund at the University of Michigan made by the Sopha family, Ionis Pharmaceuticals and the White Point Foundation of Turkey.

Rasimcan Meral, MD

Elif Arroğlu Oral, MD

## Units and Abbreviations

|             |                   |                                                                                                                                                                    |
|-------------|-------------------|--------------------------------------------------------------------------------------------------------------------------------------------------------------------|
| %fat        | %                 | Tissue %fat measured by DXA                                                                                                                                        |
| BMI         | Kg/m <sup>2</sup> | Body Mass Index                                                                                                                                                    |
| DXA         |                   | Dual Energy X-ray Absorptiometry                                                                                                                                   |
| F           |                   | Female                                                                                                                                                             |
| FFMI        | Kg/m <sup>2</sup> | Fat Free Mass Index                                                                                                                                                |
| Hisp or Lat |                   | Hispanic or Latino                                                                                                                                                 |
| M           |                   | Male                                                                                                                                                               |
| MITER       |                   | Missense InTerpretation by Experimental Response (16)<br><a href="http://miter.broadinstitute.org/">http://miter.broadinstitute.org/</a><br>Prevalence set to: 0.2 |
| NIH         |                   | National Institutes of Health                                                                                                                                      |
| OMIM        |                   | Online Mendelian Inheritance in Man                                                                                                                                |
| UM          |                   | University of Michigan                                                                                                                                             |

### Subtypes of Lipodystrophy

|       |                                                           | Affected Gene | OMIM ID |
|-------|-----------------------------------------------------------|---------------|---------|
| AGL   | Acquired Generalized Lipodystrophy                        |               |         |
| APL   | Acquired Partial Lipodystrophy                            |               |         |
| CGL   | Congenital Generalized Lipodystrophy                      |               |         |
| CGL1  | Congenital Generalized Lipodystrophy type 1               | <i>AGPAT2</i> | #608594 |
| CGL2  | Congenital Generalized Lipodystrophy type 2               | <i>BSCL2</i>  | #269700 |
| FPLD  | Familial Partial Lipodystrophy syndrome                   |               |         |
| FPLD1 | Familial Partial Lipodystrophy type 1, Köbberling variety |               | %608600 |
| FPLD2 | Familial Partial Lipodystrophy type 2, Dunnigan variety   | <i>LMNA</i>   | #151660 |
| FPLD3 | Familial Partial Lipodystrophy type 3                     | <i>PPARG</i>  | #604367 |
| FPLDX | All FPLD other than FPLD2                                 |               |         |

### Gene names

| Gene name     | Description                                                  | OMIM ID |
|---------------|--------------------------------------------------------------|---------|
| <i>AGPAT2</i> | 1-Acylglycerol-3-Phosphate O-Acyltransferase 2               | *603100 |
| <i>BSCL2</i>  | Berardinelli-Seip Congenital Lipodystrophy 2                 | *606158 |
| <i>LMNA</i>   | Lamin A/C gene                                               | *150330 |
| <i>PCYT1A</i> | Phosphate Cytidylyltransferase 1, Choline, $\alpha$ -Isoform | *123695 |
| <i>POLD1</i>  | Polymerase (DNA-Directed), $\Delta$ 1, Catalytic Subunit     | *174761 |
| <i>PPARG</i>  | Peroxisome Proliferator-Activated Receptor- $\gamma$ gene    | *601487 |

### Legend for blinded assessments presented in the appendix

|   |          | Investigators: |                                                                       |
|---|----------|----------------|-----------------------------------------------------------------------|
| n | Not FPLD | NM             | Noemi Malandrino's FPLD predictions (NIH)                             |
| y | FPLD     | RB             | Rebecca J. Brown's FPLD predictions (NIH)                             |
|   |          | RM             | Rasimcan Meral's FPLD predictions (UM)                                |
|   |          | EO             | Elif A. Oral's FPLD predictions (UM)                                  |
|   |          | BA             | Barış Akinci's FPLD predictions (independent, Dokuz Eylül University) |

Please note that after independent assessments, investigators were asked to reach a consensus on disagreed cases. Thus, individual investigators' performance may differ from the accuracies reported in the manuscript.

**Protocol: Generating a fat shadow image in enCore v14.10**

GE Lunar (Chicago, IL) DXA systems are delivered with the enCore software for the acquisition and analysis of DXA total body composition scans. All the steps described are possible with the built in features of the enCore software version 14.10. Exporting the image is not possible in the current version of the software, and the only way to save the generated fat shadow is to screen capture.

**Step 1:** Navigate to the analysis page of the DEXA scan.

**Step 2:** Enable “color coding”

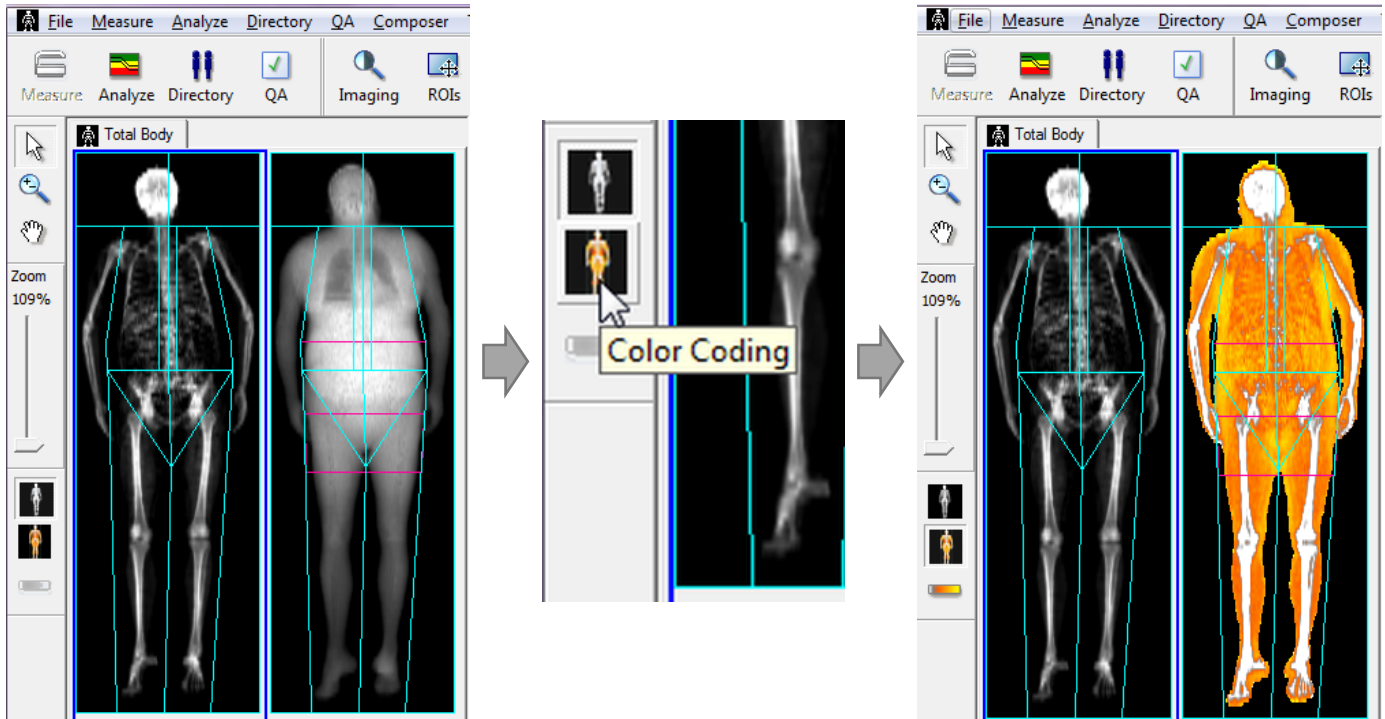

**Step 3:** Open the “edit spectrum” dialogue

**Step 4:** Highlight fat signal by setting everything other than fat to the background color, enabling easier visualization of subcutaneous fat in lipotrophic areas.

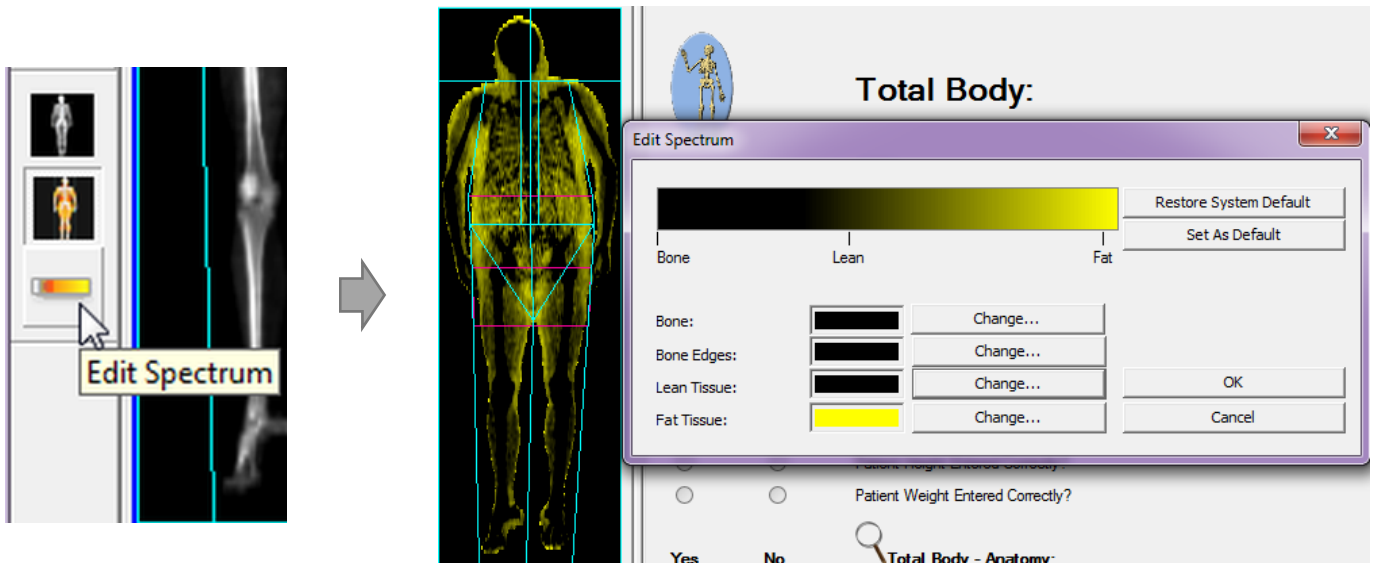



1

2

3

4

5

6

A

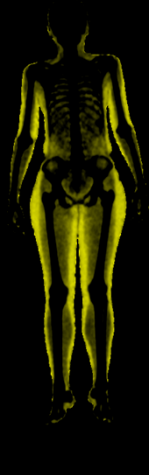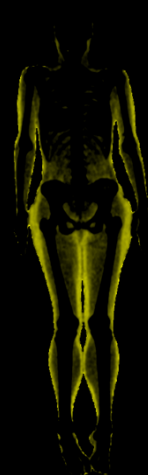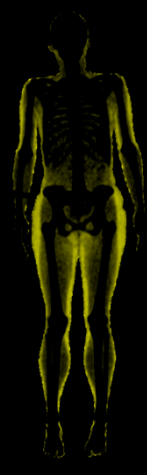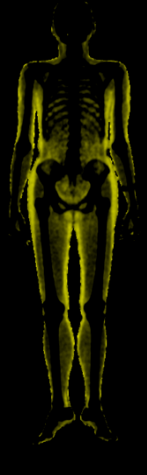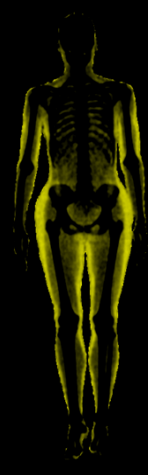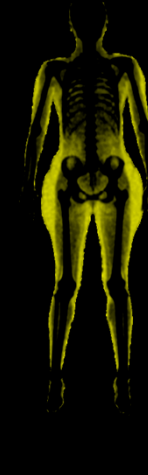

Female, 58  
BMI=19.5

Female, 63  
BMI=19.5

Female, 44  
BMI=20.2

Female, 61  
BMI=20.2

Female, 61  
BMI=20.3

Female, 40  
BMI=20.5

B

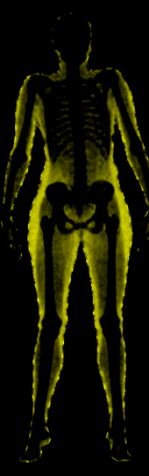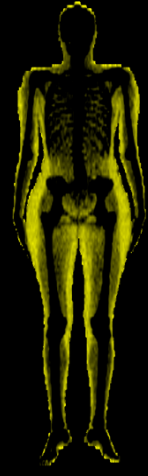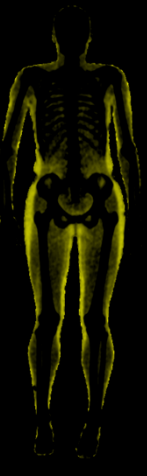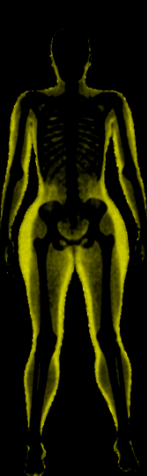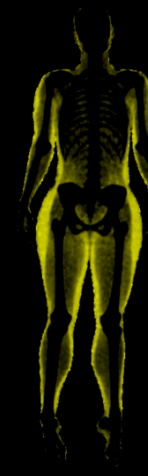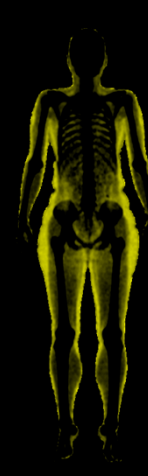

Female, 30  
BMI=20.6

Female, 21  
BMI=21.3

Female, 30  
BMI=21.8

Female, 27  
BMI=22.2

Female, 28  
BMI=22.3

Female, 54  
BMI=22.4

C

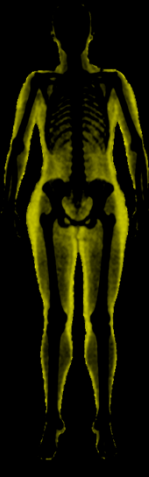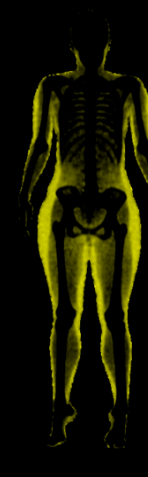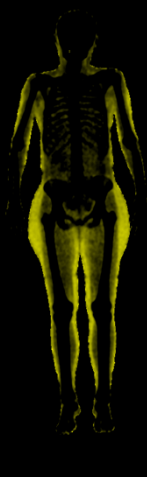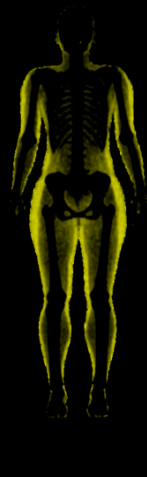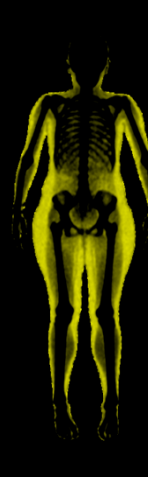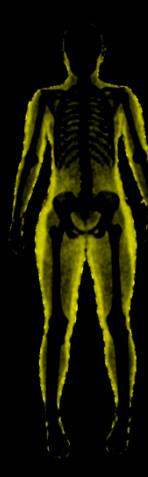

Female, 29  
BMI=22.4

Female, 20  
BMI=22.4

Female, 59  
BMI=22.5

Female, 23  
BMI=22.8

Female, 18  
BMI=22.9

Female, 19  
BMI=23

1

2

3

4

5

6

A

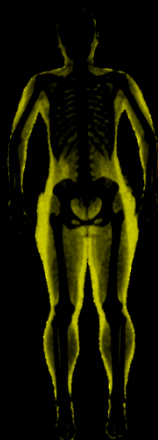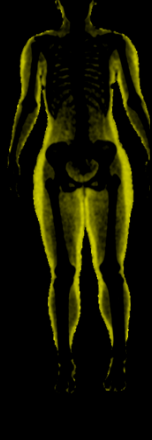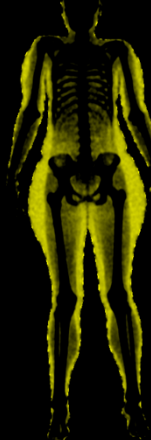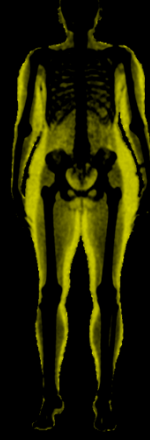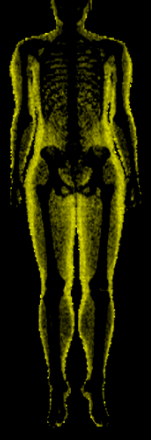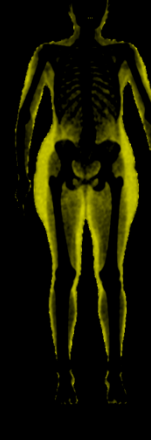

Female, 25  
BMI=23.2

Female, 23  
BMI=23.3

Female, 28  
BMI=23.4

Female, 65  
BMI=23.5

Female, 19  
BMI=23.6

Female, 54  
BMI=24.1

B

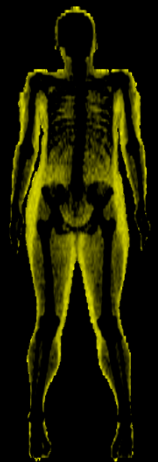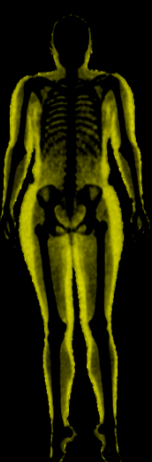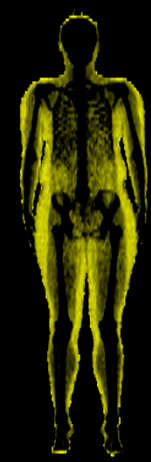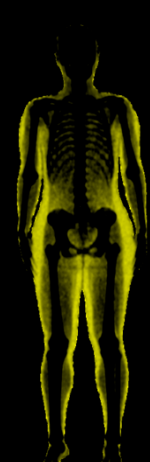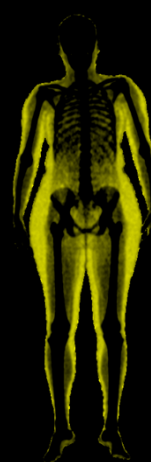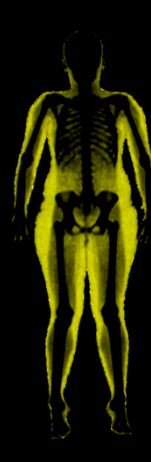

Female, 44  
BMI=24.2

Female, 26  
BMI=24.5

Female, 35  
BMI=24.6

Female, 28  
BMI=24.9

Female, 44  
BMI=25

Female, 19  
BMI=27.1

C

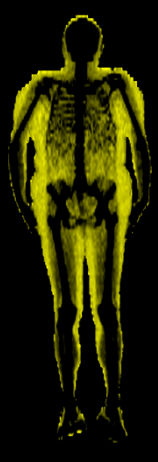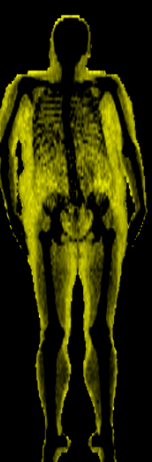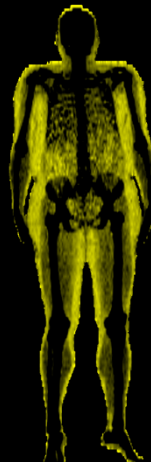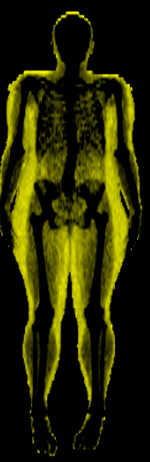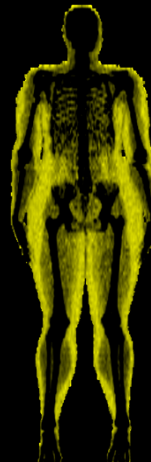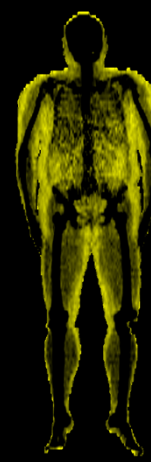

Female, 63  
BMI=27.5

Female, 50  
BMI=29.1

Female, 53  
BMI=30.1

Female, 26  
BMI=30.2

Female, 29  
BMI=30.6

Female, 68  
BMI=31.2

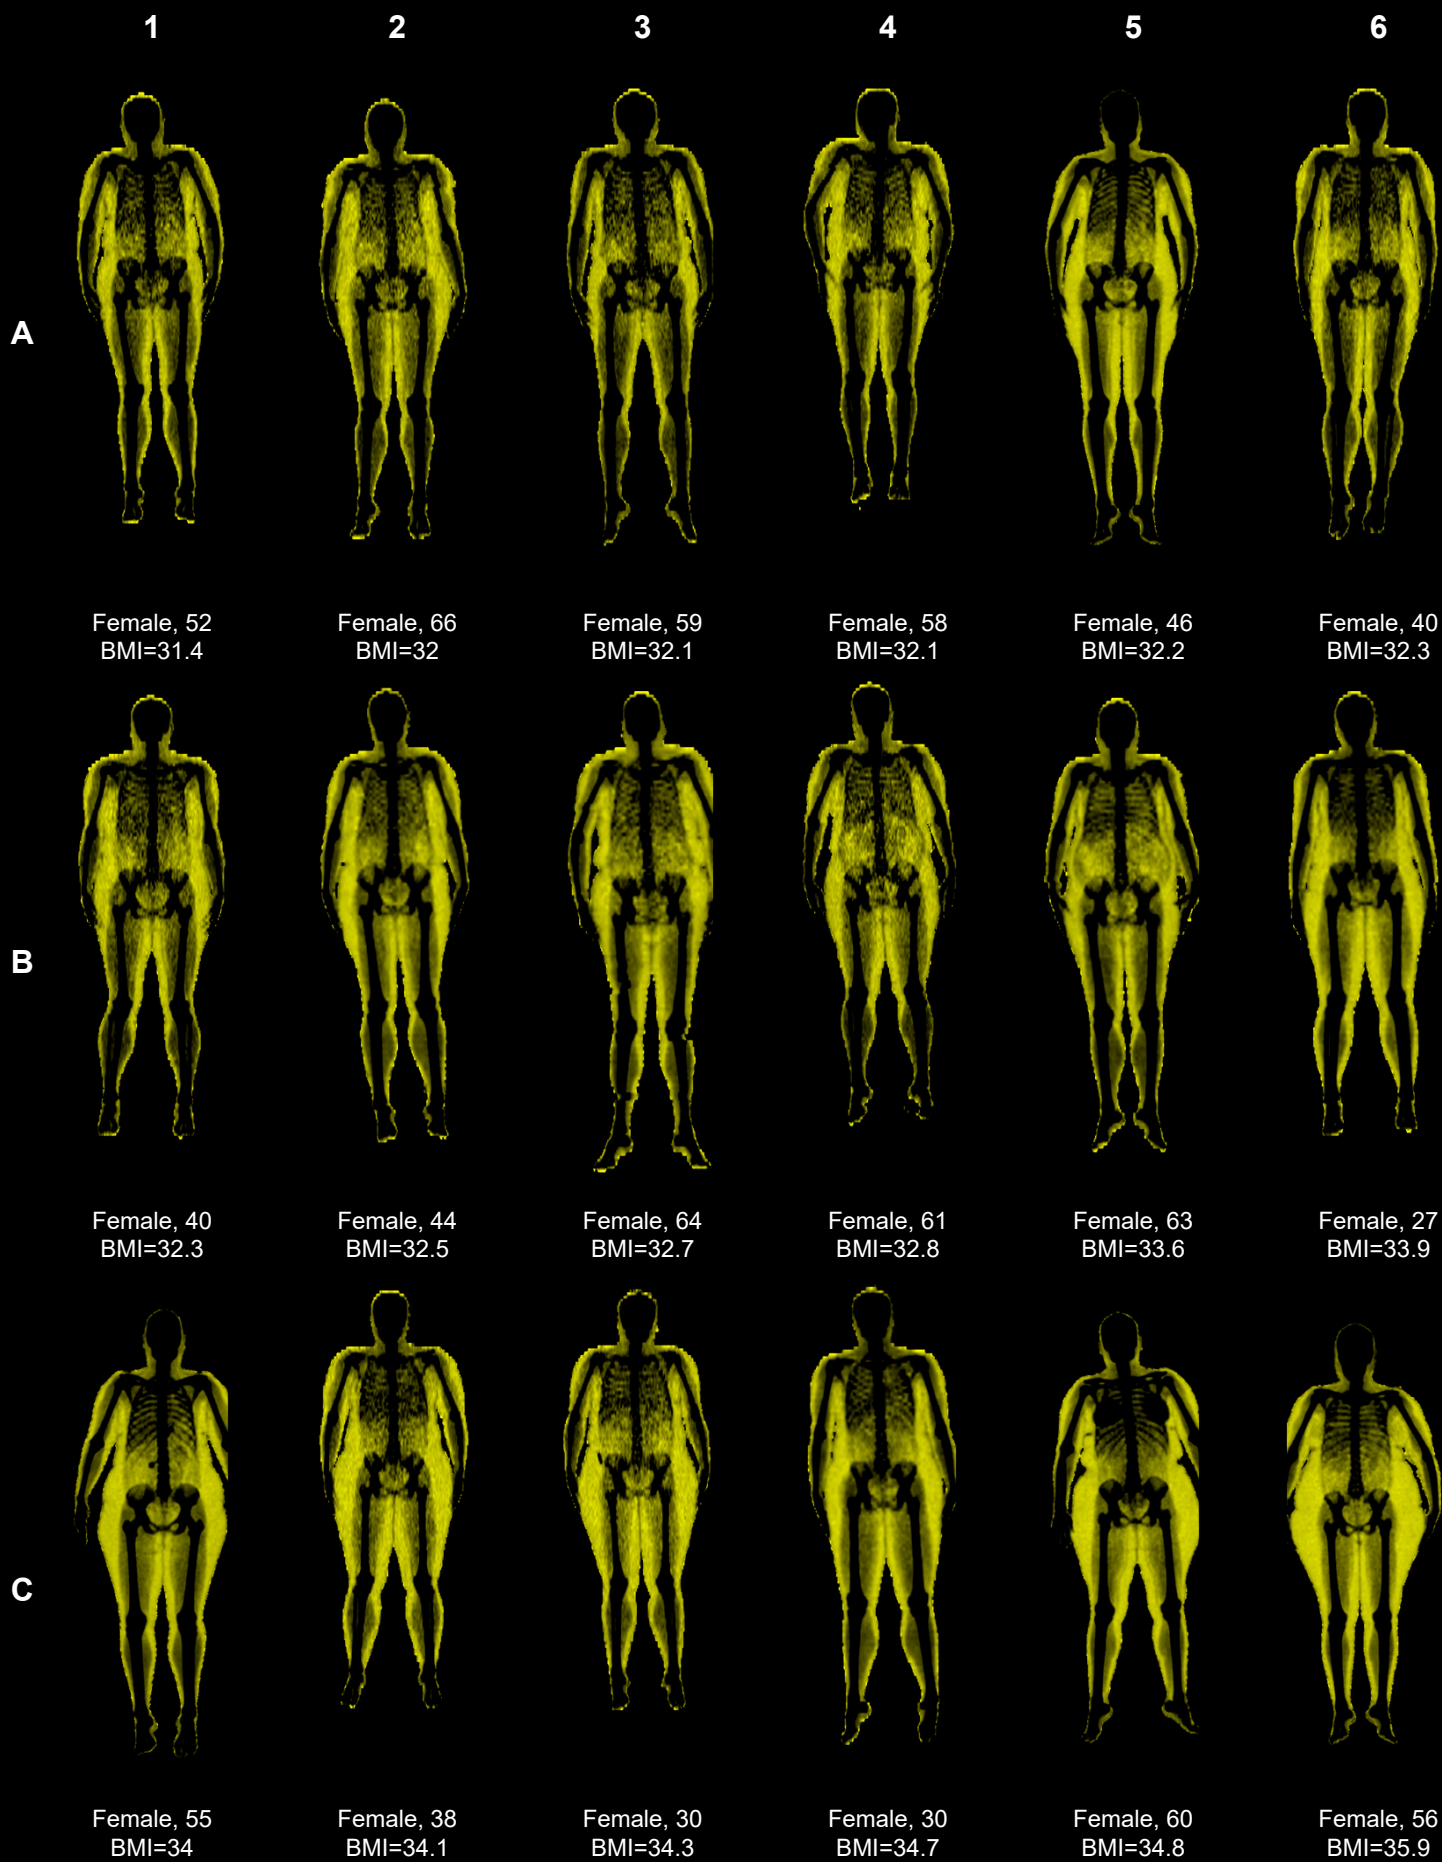

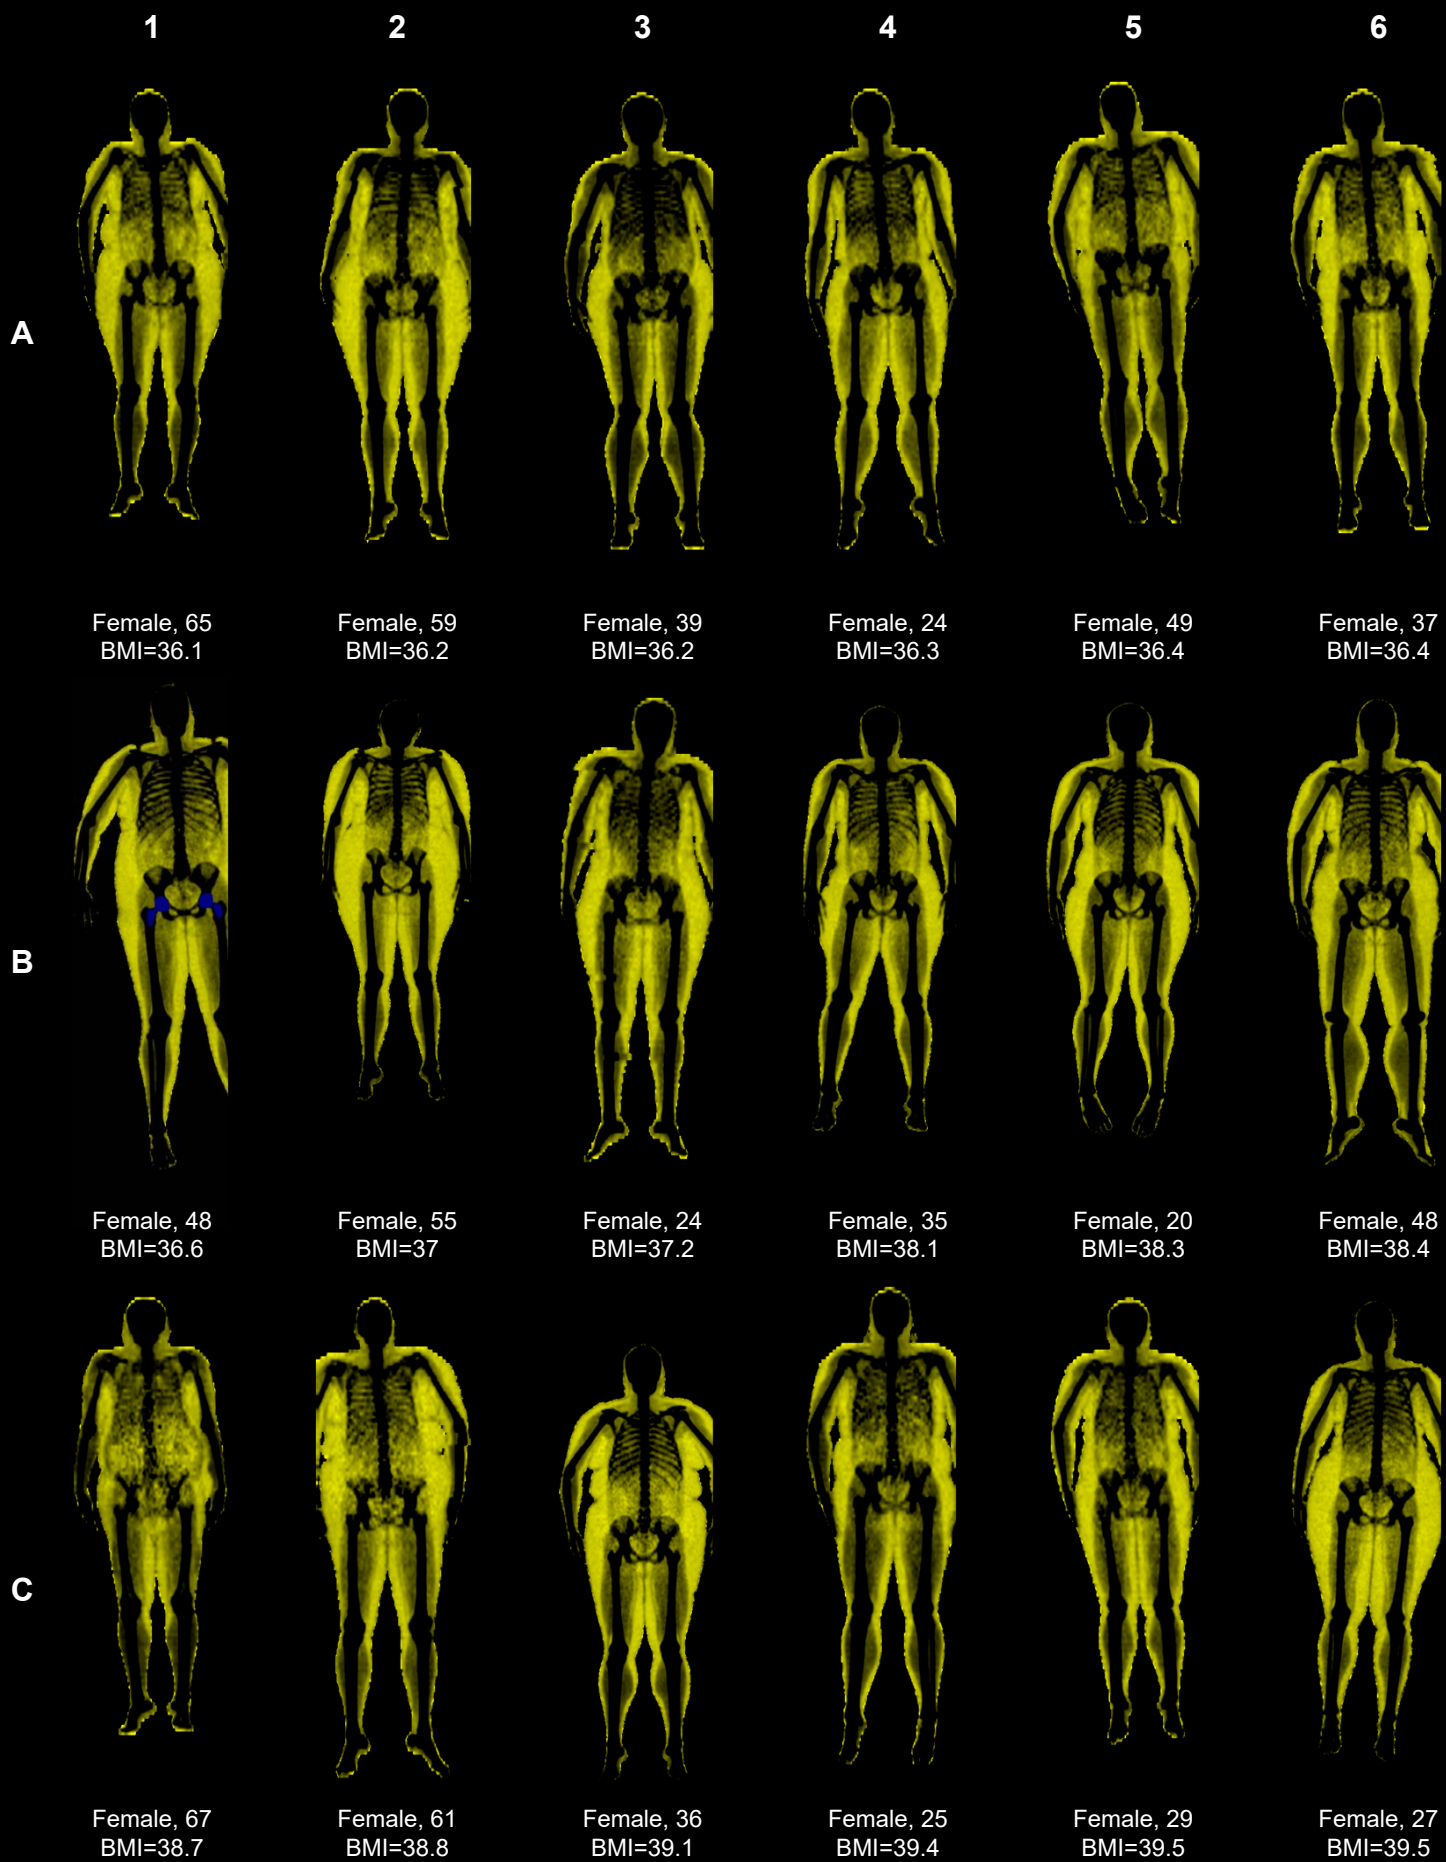



1

2

3

4

5

6

A

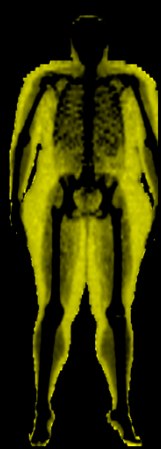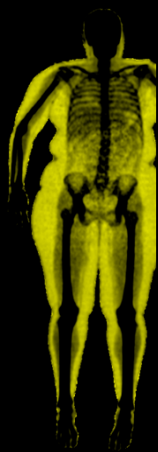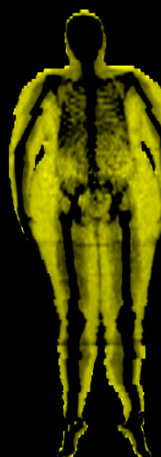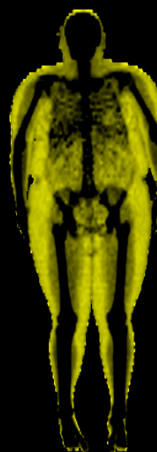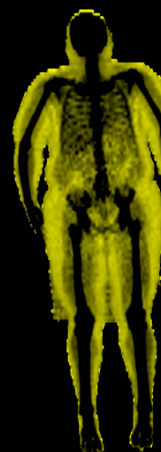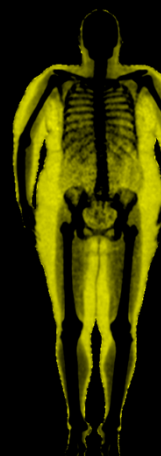

Female, 26  
BMI=39.6

Female, 42  
BMI=39.6

Female, 51  
BMI=39.6

Female, 52  
BMI=40

Female, 64  
BMI=41.2

Female, 51  
BMI=41.3

B

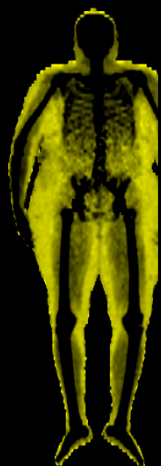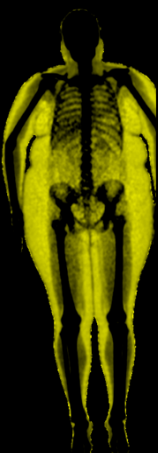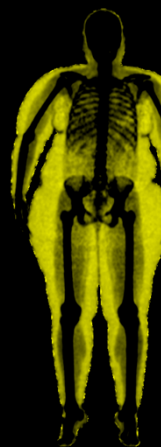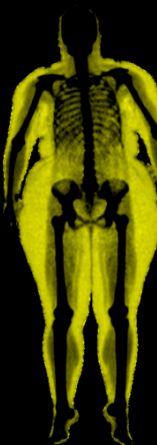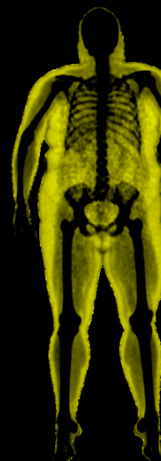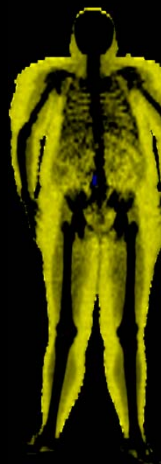

Female, 61  
BMI=41.3

Female, 39  
BMI=42.2

Female, 52  
BMI=42.4

Female, 38  
BMI=42.4

Female, 50  
BMI=42.5

Female, 54  
BMI=42.9

C

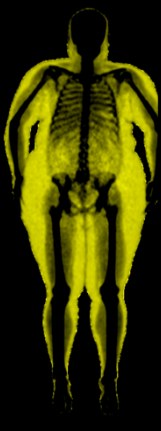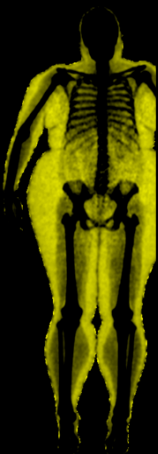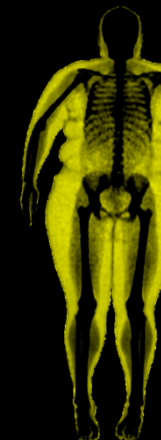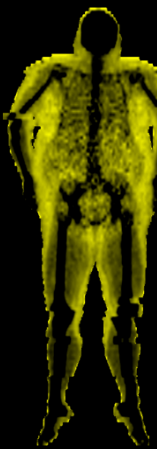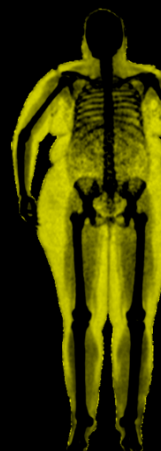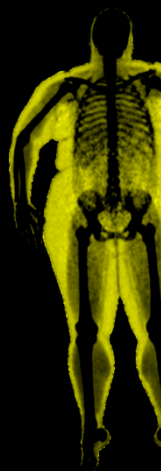

Female, 41  
BMI=43

Female, 53  
BMI=44.3

Female, 19  
BMI=44.3

Female, 57  
BMI=44.7

Female, 50  
BMI=45.5

Female, 32  
BMI=49.1

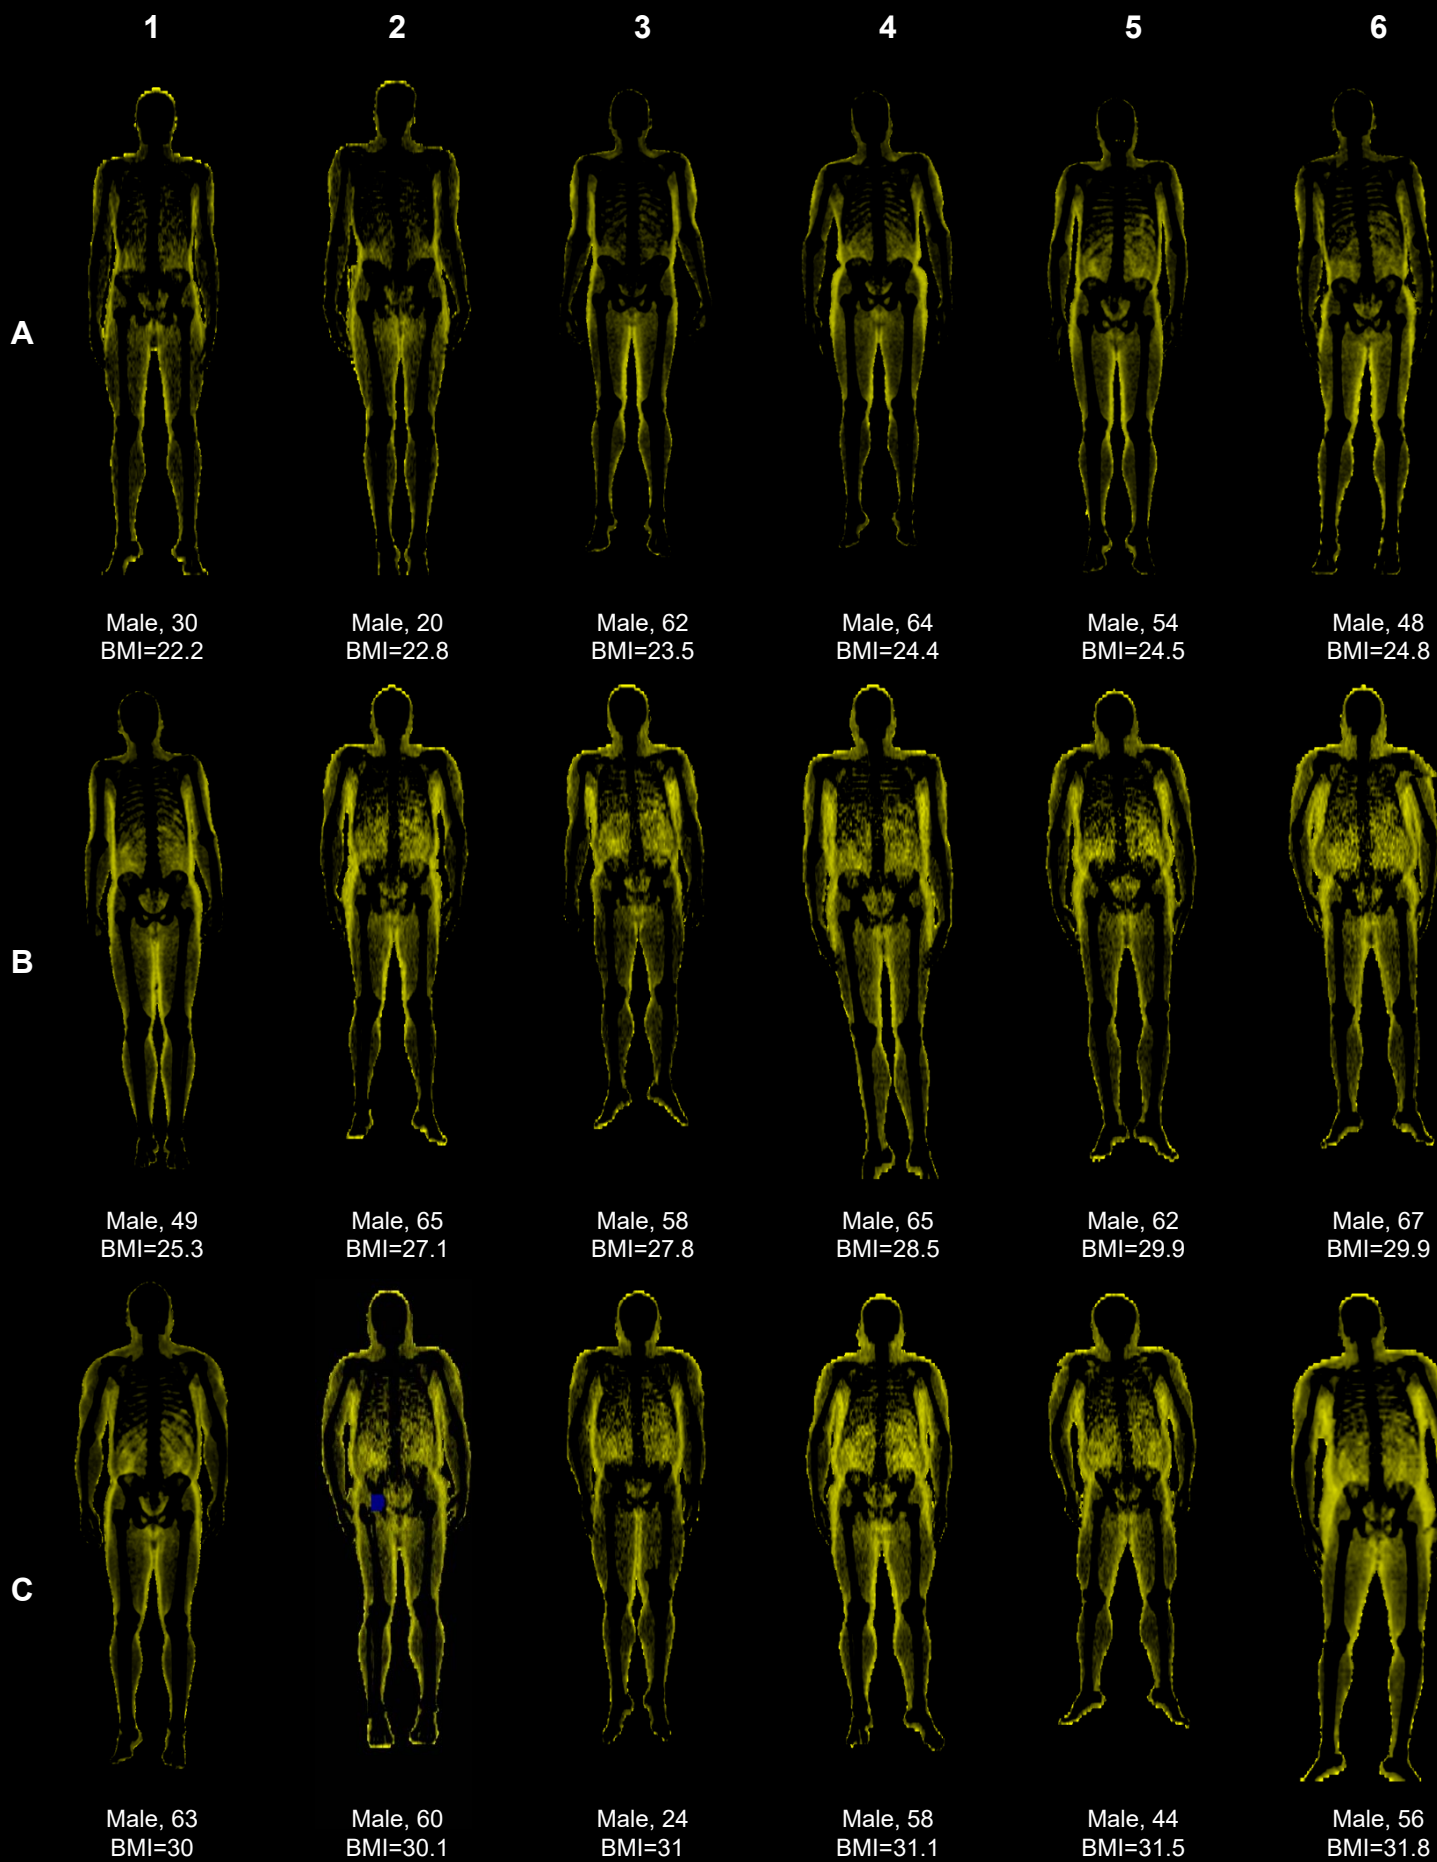

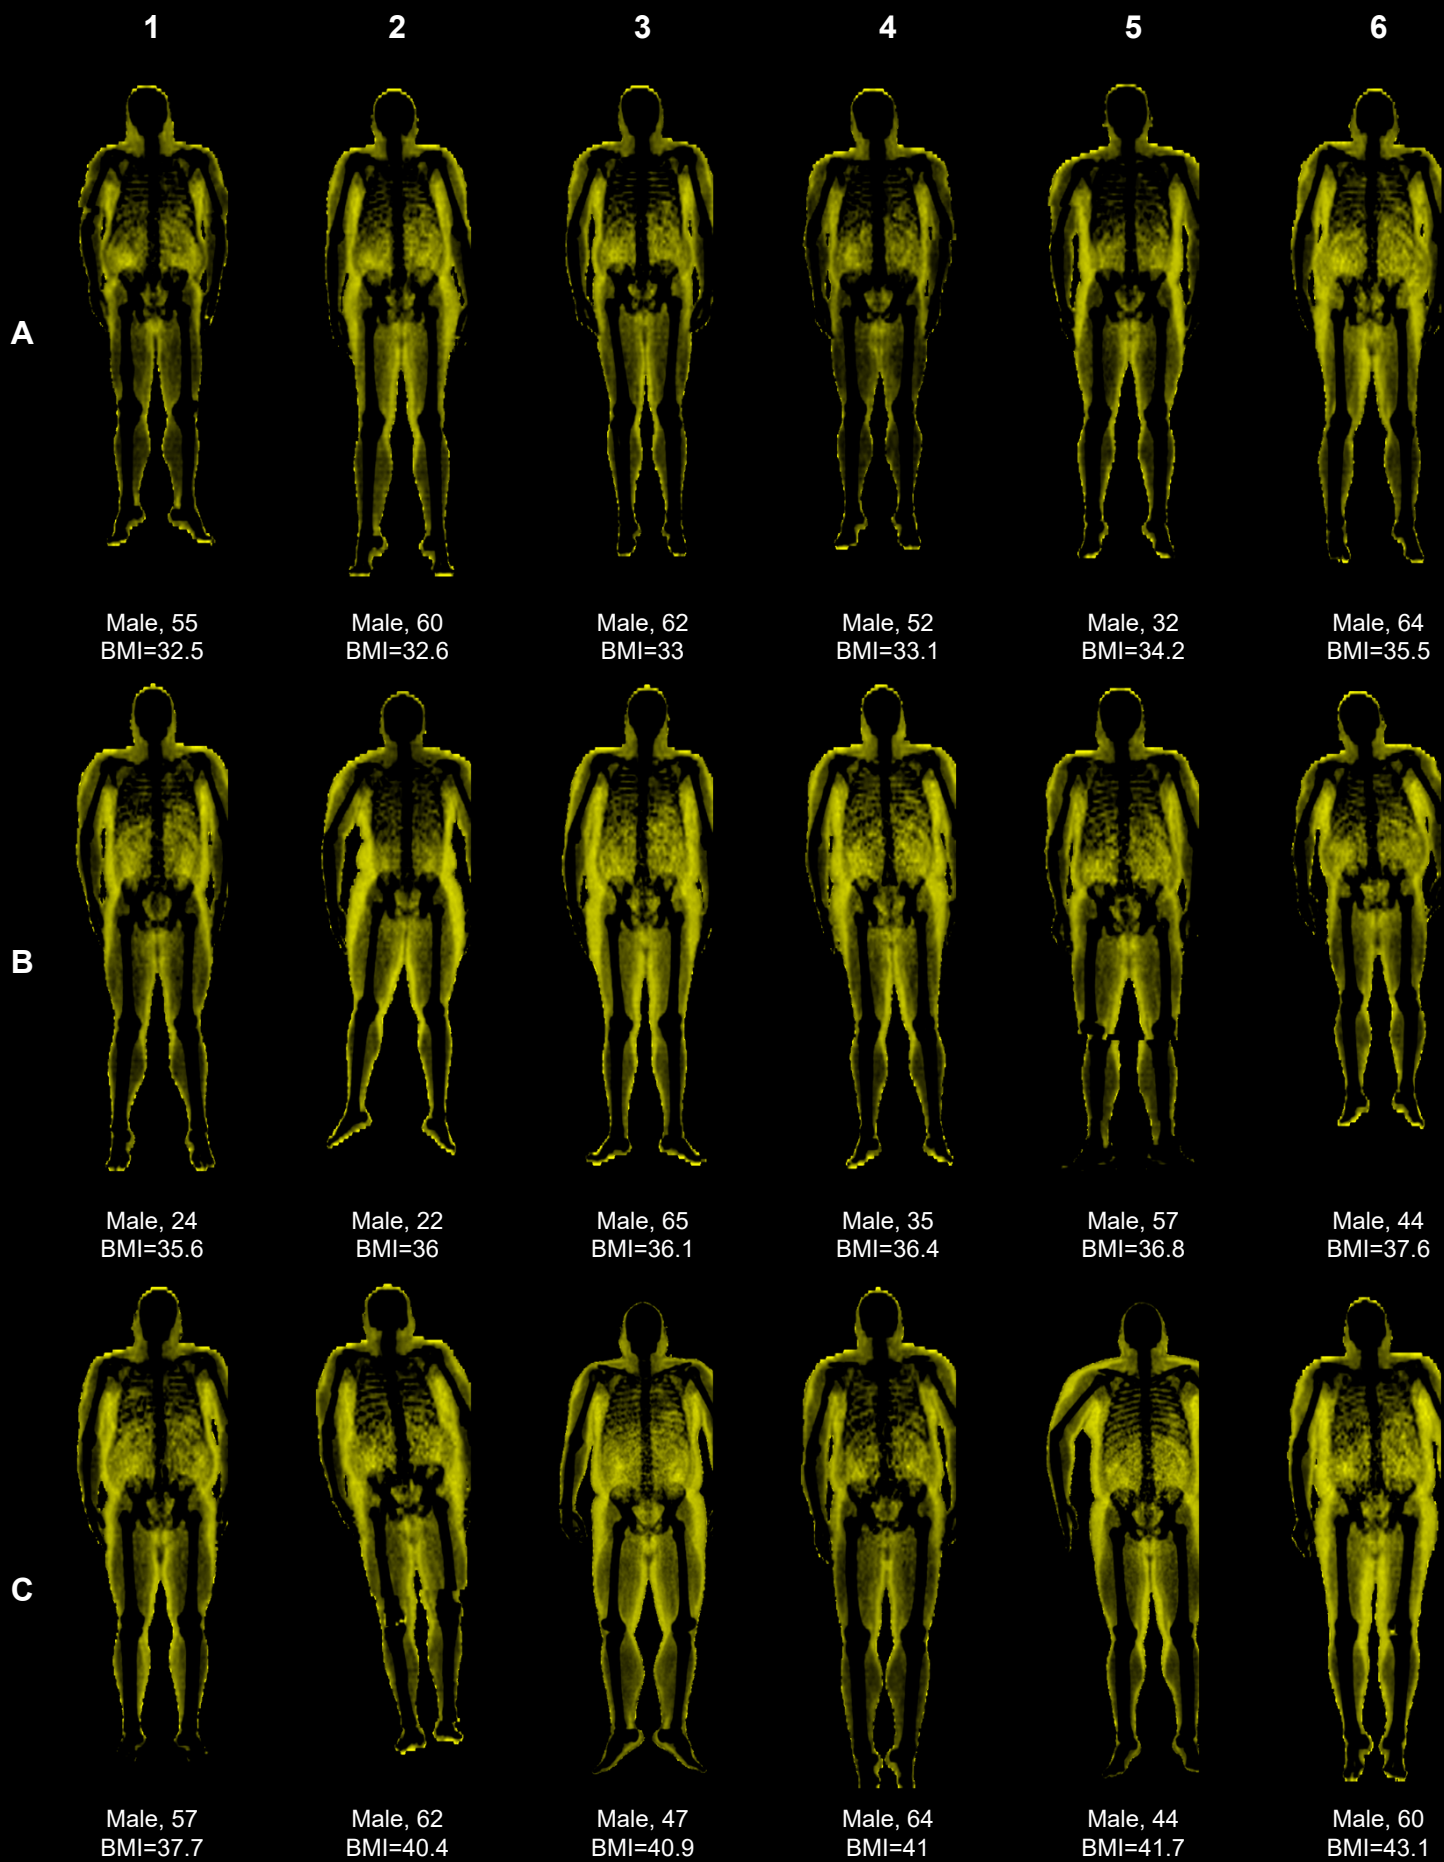



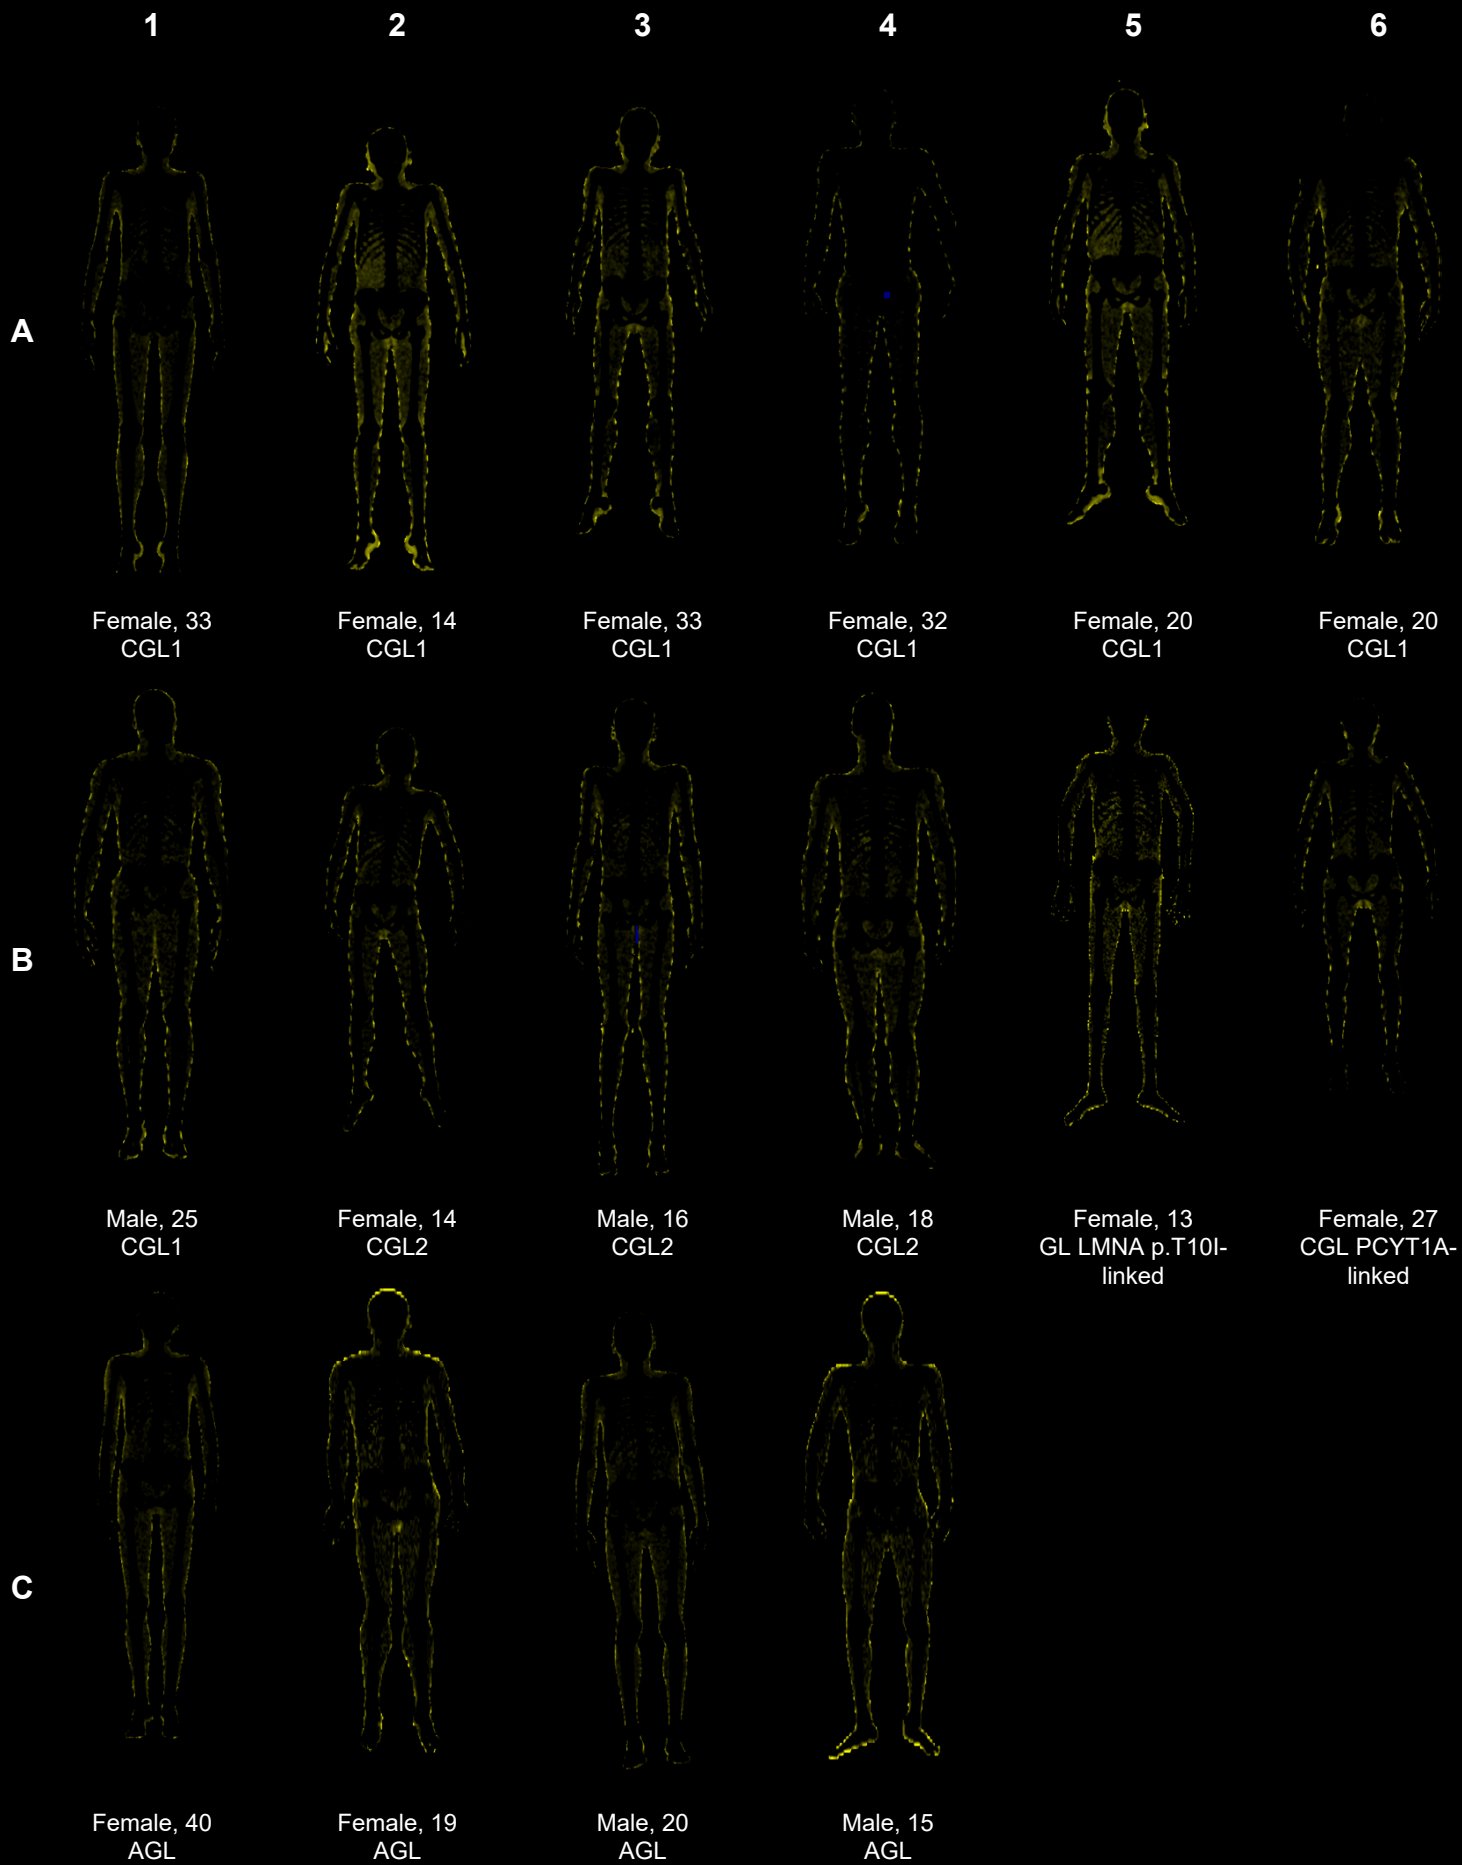

1

2

3

4

5

6

A

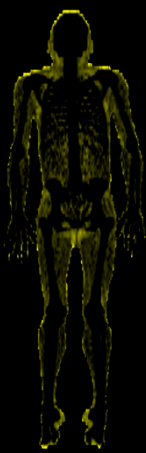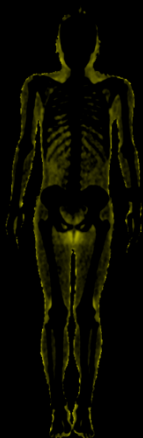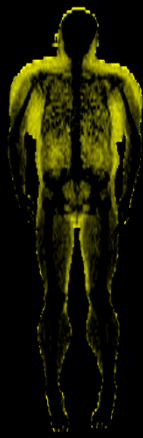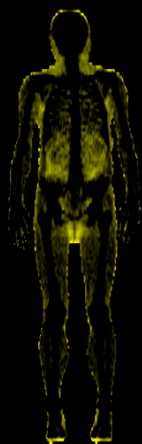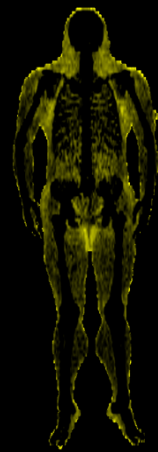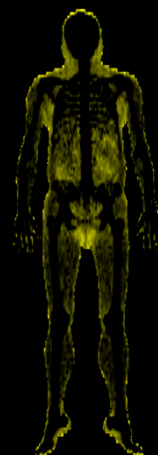

Female, 33  
FPLD2

Female, 15  
FPLD2

Female, 37  
FPLD2

Female, 59  
FPLD2

Female, 30  
FPLD2

Female, 59  
FPLD2

B

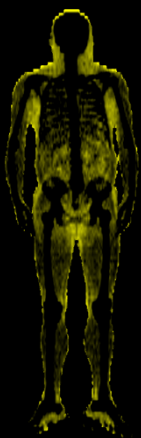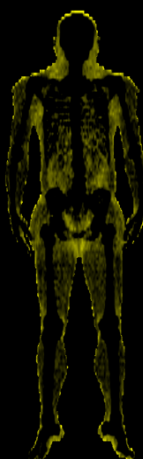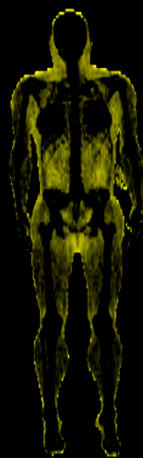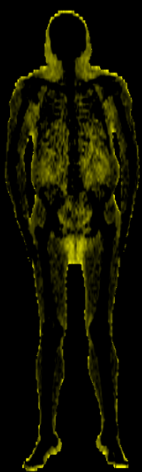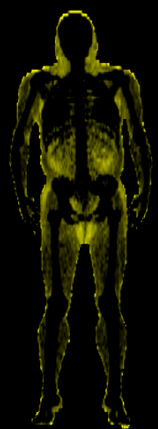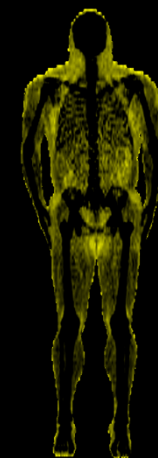

Female, 55  
FPLD2

Female, 42  
FPLD2

Female, 49  
FPLD2

Female, 57  
FPLD2

Female, 49  
FPLD2

Female, 40  
FPLD2

C

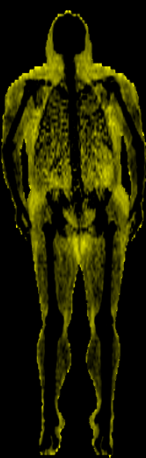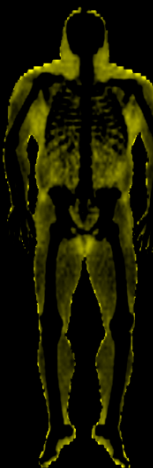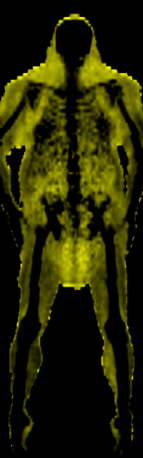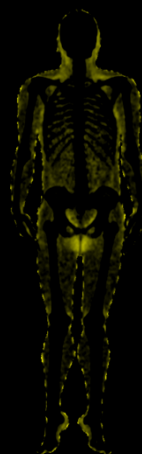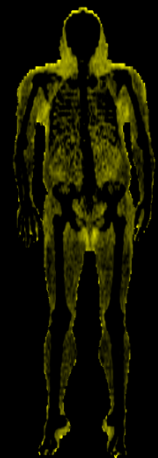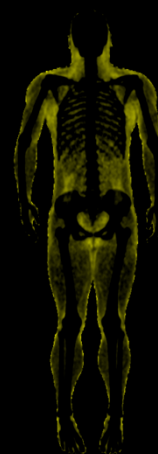

Female, 40  
FPLD2

Female, 30  
FPLD2

Female, 62  
FPLD2

Female, 38  
FPLD2

Female, 41  
FPLD2

Female, 19  
FPLD2

1

2

3

4

5

6

A

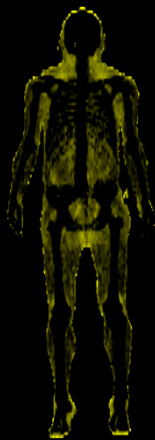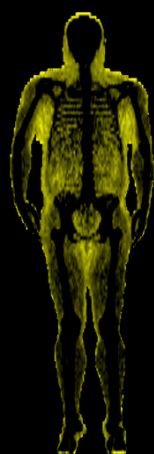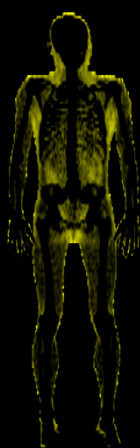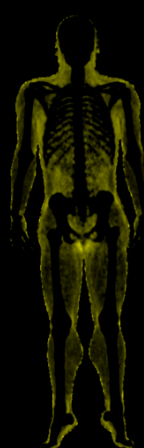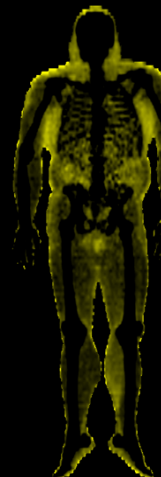

Female, 58  
FPLD2

Female, 45  
FPLD2

Female, 33  
FPLD2

Female, 18  
FPLD2

Male, 49  
FPLD2

B

C

1

2

3

4

5

6

A

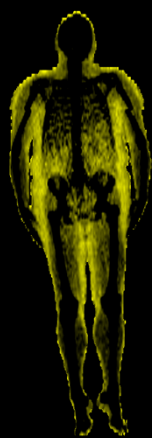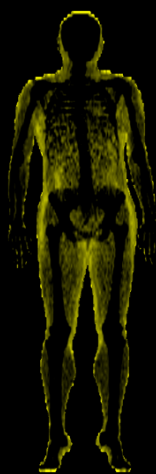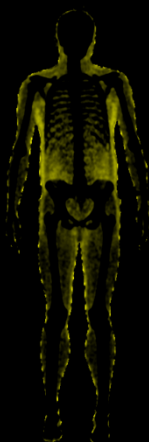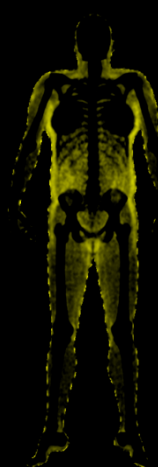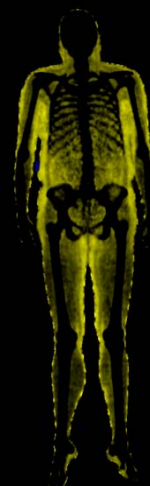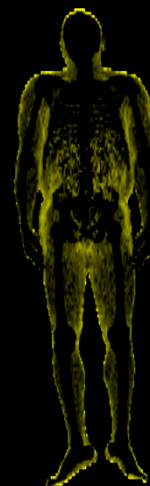

Female, 64  
FPLDX

Female, 34  
FPLDX

Female, 27  
FPLDX

Female, 54  
FPLDX

Female, 51  
FPLDX

Male, 52  
FPLDX

B

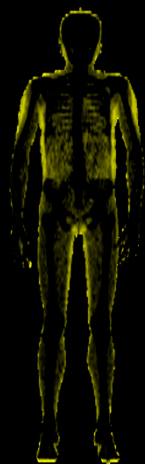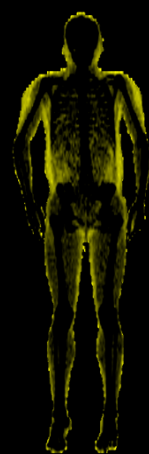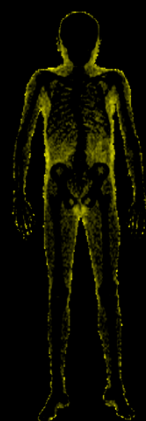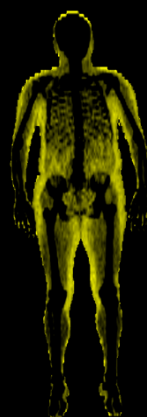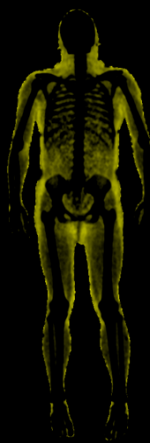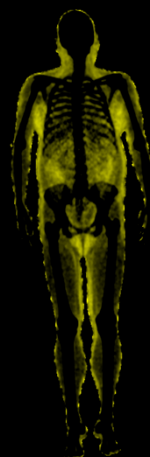

Female, 34  
FPLDX

Female, 14  
FPLDX

Female, 12  
FPLDX

Female, 54  
FPLDX

Female, 45  
FPLDX

Female, 47  
FPLDX

C

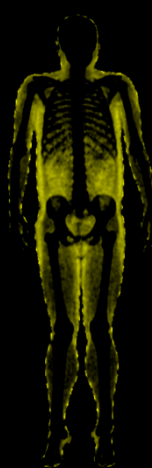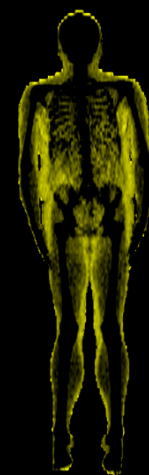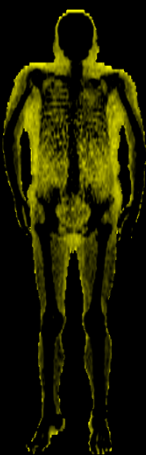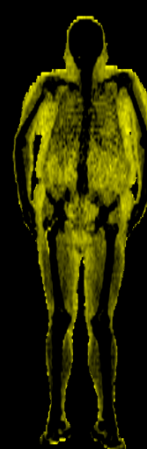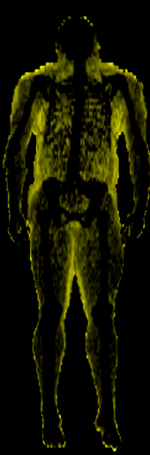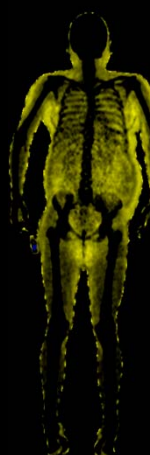

Female, 16  
FPLDX

Female, 45  
FPLDX

Female, 33  
FPLDX

Female, 63  
FPLDX

Female, 23  
FPLDX

Female, 41  
FPLDX

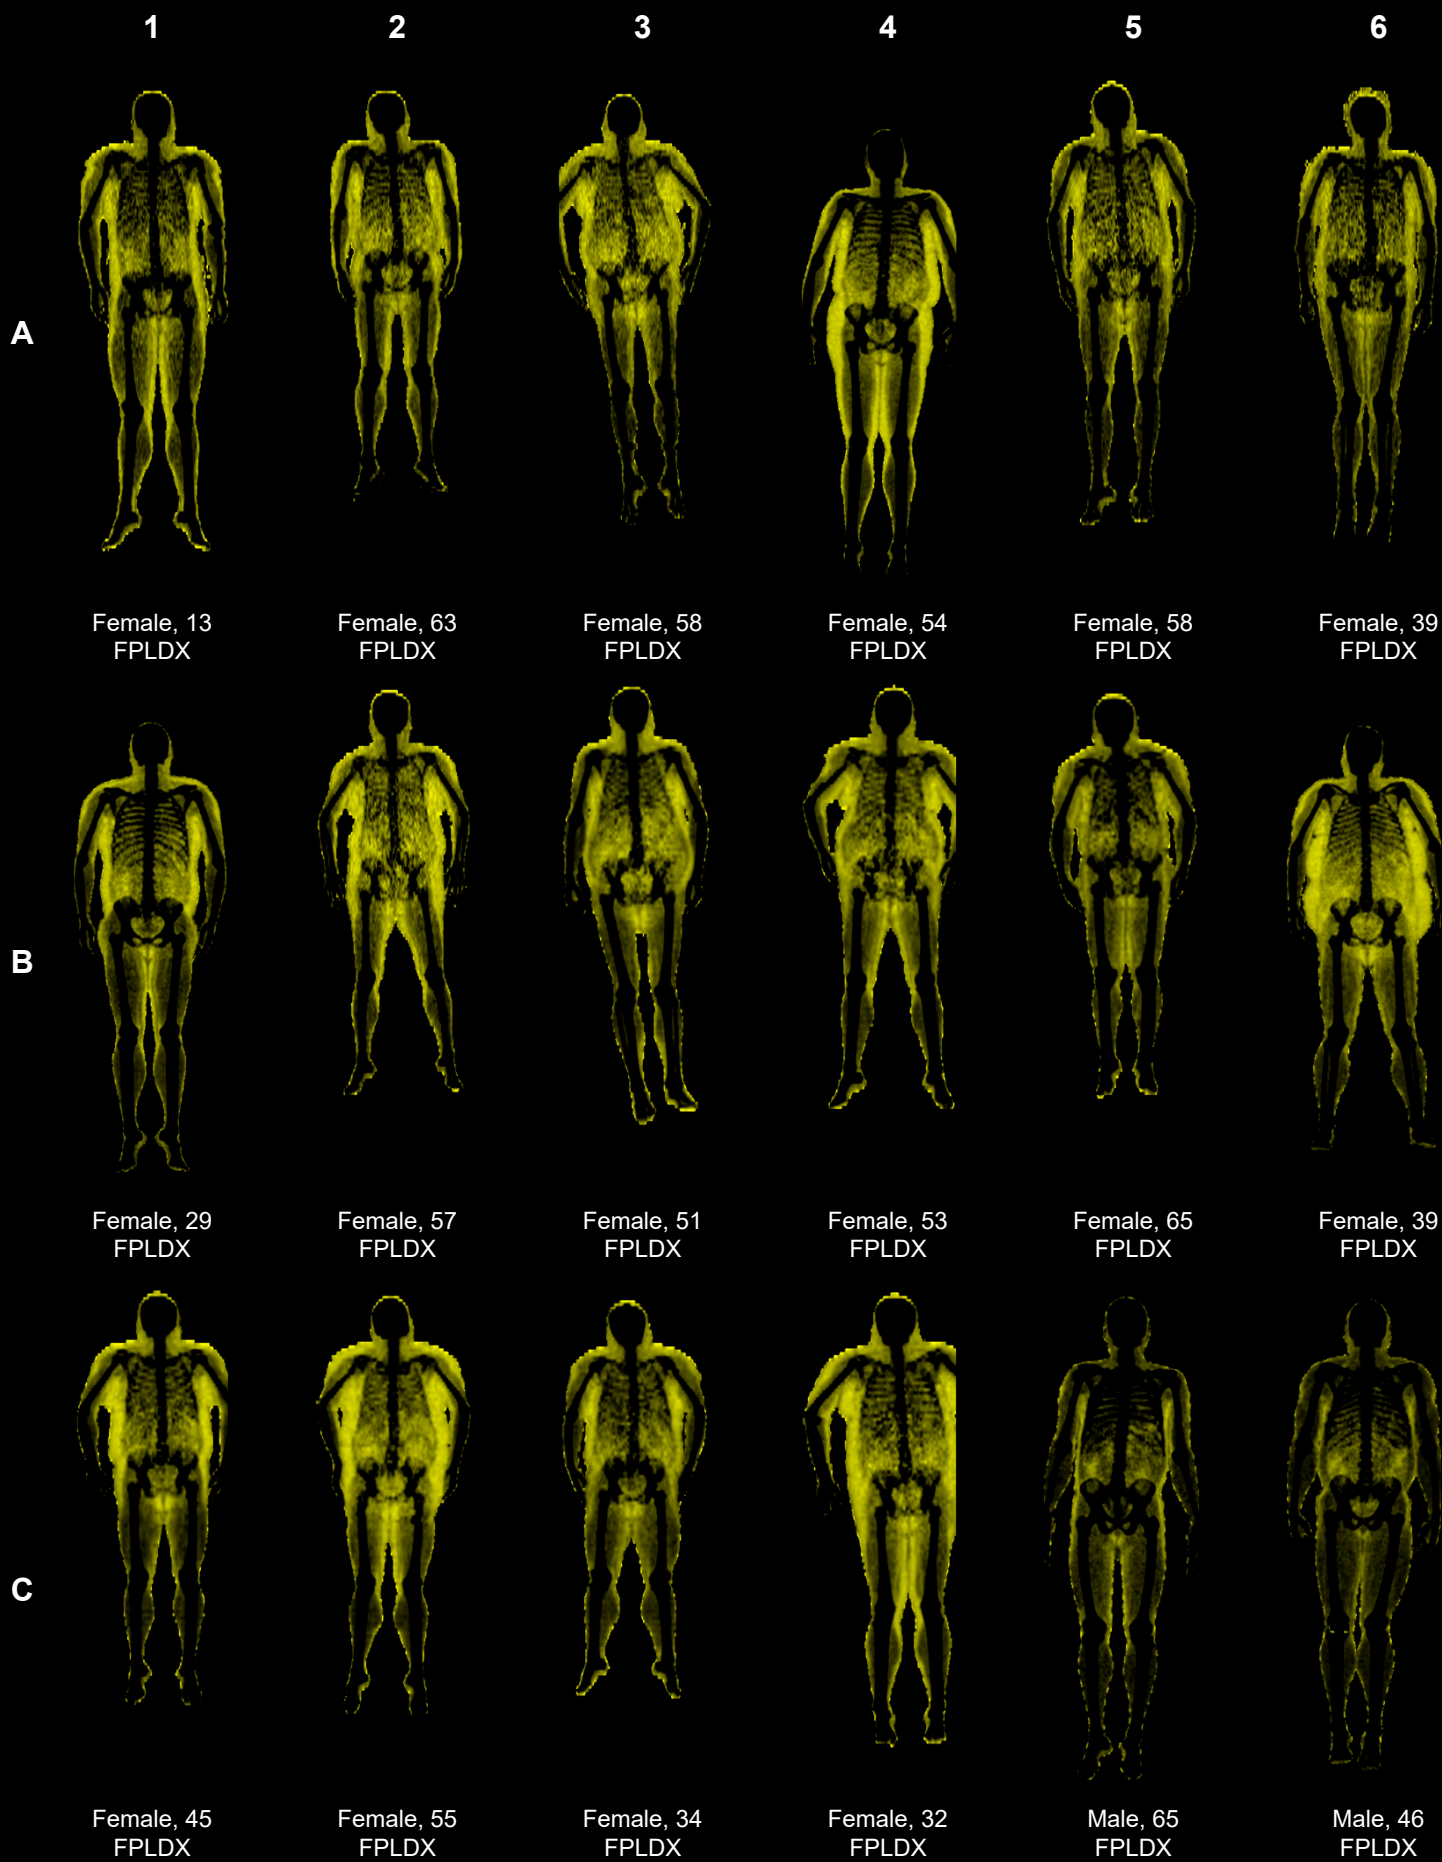

1

2

3

4

5

6

A

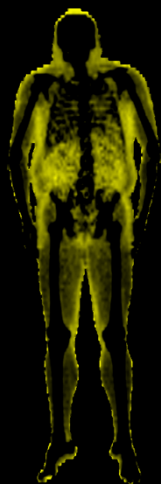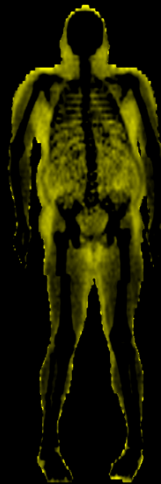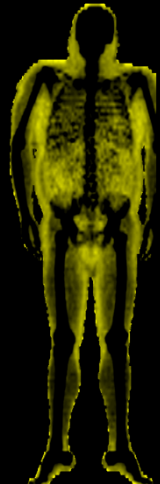

Male, 62  
FPLDX

Male, 38  
FPLDX

Male, 34  
FPLDX

B

C

1

2

3

4

5

6

A

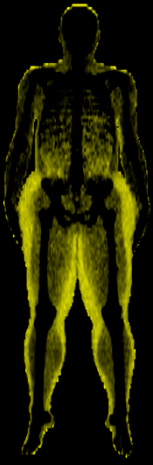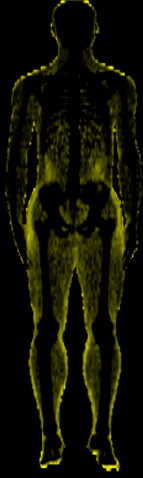

Female, 40  
APL

Male, 24  
APL

B

C



SUPPLEMENTARY DATA

| p. Row | Col | Group | Genetic comments | NMI | RB | RM | EO | BA | Sex | Race  | Hispanic or Latino | Age | BMI  | FFMI | Arms %fat | Legs %fat | Trunk %fat | Total %fat | Site | Table   | ID    |
|--------|-----|-------|------------------|-----|----|----|----|----|-----|-------|--------------------|-----|------|------|-----------|-----------|------------|------------|------|---------|-------|
| 5      | A   | 1     | Control          |     | n  | n  | n  | n  | F   | White |                    | 58  | 19.5 | 13.8 | 33.6      | 38.6      | 23.1       | 30.7       | NIH  | iDXA    | KFQ39 |
| 5      | A   | 2     | Control          |     | n  | n  | n  | n  | F   | White |                    | 63  | 19.5 | 15.6 | 21.8      | 26.9      | 16.1       | 21.2       | NIH  | iDXA    | QUN74 |
| 5      | A   | 3     | Control          |     | n  | n  | n  | n  | F   | White |                    | 44  | 20.2 | 16.5 | 21.5      | 26.2      | 13.2       | 19.7       | NIH  | iDXA    | WQW90 |
| 5      | A   | 4     | Control          |     | n  | n  | n  | n  | F   | White |                    | 61  | 20.2 | 15.1 | 24.6      | 24.6      | 29.5       | 26.8       | NIH  | iDXA    | XDE96 |
| 5      | A   | 5     | Control          |     | n  | n  | n  | n  | F   | White |                    | 61  | 20.3 | 15.0 | 30.1      | 33.1      | 24.3       | 27.9       | NIH  | iDXA    | JHD98 |
| 5      | A   | 6     | Control          |     | n  | n  | n  | n  | F   | White |                    | 40  | 20.5 | 13.4 | 36.2      | 40.4      | 34.4       | 36.2       | NIH  | iDXA    | VZP99 |
| 5      | B   | 1     | Control          |     | n  | n  | n  | n  | F   | White |                    | 30  | 20.6 | 14.8 | 27.5      | 33.8      | 28.0       | 29.6       | NIH  | iDXA    | OPG61 |
| 5      | B   | 2     | Control          |     | n  | n  | n  | n  | F   | White |                    | 21  | 21.3 | 13.7 | 36.5      | 39.4      | 34.3       | 35.6       | UM   | Prodiqy | IDL87 |
| 5      | B   | 3     | Control          |     | n  | n  | n  | n  | F   | White |                    | 30  | 21.8 | 17.1 | 19.7      | 25.2      | 21.1       | 22.5       | NIH  | iDXA    | UNQ13 |
| 5      | B   | 4     | Control          |     | n  | n  | n  | n  | F   | White |                    | 27  | 22.2 | 15.7 | 32.5      | 34.3      | 26.5       | 30.1       | NIH  | iDXA    | YAS44 |
| 5      | B   | 5     | Control          |     | n  | n  | n  | n  | F   | White |                    | 28  | 22.3 | 16.3 | 28.6      | 32.0      | 25.9       | 28.3       | NIH  | iDXA    | ZDO81 |
| 5      | B   | 6     | Control          |     | n  | n  | n  | n  | F   | White |                    | 54  | 22.4 | 16.3 | 29.4      | 30.0      | 28.6       | 28.8       | NIH  | iDXA    | BFE14 |
| 5      | C   | 1     | Control          |     | n  | n  | n  | n  | F   | White |                    | 29  | 22.4 | 15.4 | 31.5      | 31.3      | 35.2       | 32.4       | NIH  | iDXA    | PXF64 |
| 5      | C   | 2     | Control          |     | n  | n  | n  | n  | F   | White |                    | 20  | 22.4 | 16.0 | 29.6      | 35.6      | 26.2       | 29.6       | NIH  | iDXA    | UYQ24 |
| 5      | C   | 3     | Control          |     | n  | n  | n  | n  | F   | White |                    | 59  | 22.5 | 17.6 | 28.2      | 33.4      | 13.7       | 23.2       | NIH  | iDXA    | ANF11 |
| 5      | C   | 4     | Control          |     | n  | n  | n  | n  | F   | White |                    | 23  | 22.8 | 17.1 | 29.1      | 31.1      | 22.6       | 26.9       | NIH  | iDXA    | MII85 |
| 5      | C   | 5     | Control          |     | n  | n  | n  | n  | F   | White | Yes                | 18  | 22.9 | 13.4 | 45.1      | 48.3      | 41.4       | 42.9       | NIH  | iDXA    | JSD88 |
| 5      | C   | 6     | Control          |     | n  | n  | n  | n  | F   | White |                    | 19  | 23.0 | 15.9 | 33.8      | 36.8      | 30.2       | 32.6       | NIH  | iDXA    | PVA92 |
| 6      | A   | 1     | Control          |     | n  | n  | n  | n  | F   | White |                    | 25  | 23.2 | 16.5 | 31.1      | 34.2      | 28.1       | 30.2       | NIH  | iDXA    | ALS78 |
| 6      | A   | 2     | Control          |     | n  | n  | n  | n  | F   | White |                    | 23  | 23.3 | 17.6 | 28.2      | 31.0      | 22.4       | 26.0       | NIH  | iDXA    | CHM79 |
| 6      | A   | 3     | Control          |     | n  | n  | n  | n  | F   | White |                    | 28  | 23.4 | 15.0 | 34.5      | 41.6      | 35.3       | 37.1       | NIH  | iDXA    | KIT67 |
| 6      | A   | 4     | Control          |     | n  | n  | n  | n  | F   | White |                    | 65  | 23.5 | 15.2 | 37.8      | 39.4      | 36.9       | 37.1       | NIH  | iDXA    | UJR41 |
| 6      | A   | 5     | Control          |     | n  | n  | n  | n  | F   | White |                    | 19  | 23.6 | 16.5 | 28.3      | 30.6      | 30.7       | 29.9       | UM   | Prodiqy | LEK63 |
| 6      | A   | 6     | Control          |     | n  | n  | n  | n  | F   | White |                    | 54  | 24.1 | 17.0 | 24.8      | 36.6      | 27.1       | 30.6       | NIH  | iDXA    | ONQ49 |
| 6      | B   | 1     | Control          |     | n  | n  | n  | n  | F   | White |                    | 44  | 24.2 | 15.9 | 38.5      | 33.2      | 35.2       | 34.1       | UM   | Prodiqy | FJS39 |
| 6      | B   | 2     | Control          |     | n  | n  | n  | n  | F   | White |                    | 26  | 24.5 | 16.1 | 37.1      | 39.7      | 33.7       | 35.6       | NIH  | iDXA    | IYY32 |
| 6      | B   | 3     | Control          |     | n  | n  | n  | n  | F   | White |                    | 35  | 24.6 | 14.8 | 39.6      | 38.9      | 41.8       | 39.6       | UM   | Prodiqy | NNK49 |
| 6      | B   | 4     | Control          |     | n  | n  | n  | n  | F   | Other |                    | 28  | 24.9 | 16.5 | 35.8      | 36.6      | 34.2       | 34.4       | NIH  | iDXA    | ZQL51 |
| 6      | B   | 5     | Control          |     | n  | n  | n  | n  | F   | White |                    | 44  | 25.0 | 15.2 | 40.9      | 40.9      | 41.5       | 40.1       | NIH  | iDXA    | AZA20 |
| 6      | B   | 6     | Control          |     | n  | n  | n  | n  | F   | White | Yes                | 19  | 27.1 | 15.3 | 45.0      | 47.2      | 44.3       | 44.1       | NIH  | iDXA    | HNU96 |
| 6      | C   | 1     | Control          |     | n  | n  | n  | n  | F   | White | No                 | 63  | 27.5 | 15.4 | 42.4      | 39.5      | 51.7       | 46.1       | UM   | Prodiqy | AEX51 |
| 6      | C   | 2     | Control          |     | n  | n  | n  | n  | F   | White |                    | 50  | 29.1 | 16.7 | 37.8      | 32.8      | 52.3       | 44.6       | UM   | Prodiqy | MXN95 |
| 6      | C   | 3     | Control          |     | n  | n  | n  | n  | F   | White |                    | 53  | 30.1 | 17.9 | 39.1      | 38.8      | 47.0       | 42.6       | UM   | Prodiqy | FYQ82 |
| 6      | C   | 4     | Control          |     | n  | n  | n  | n  | F   | White |                    | 26  | 30.2 | 17.8 | 35.3      | 41.0      | 43.6       | 40.8       | UM   | Prodiqy | UXQ25 |
| 6      | C   | 5     | Control          |     | n  | n  | n  | n  | F   | White |                    | 29  | 30.6 | 16.5 | 41.0      | 48.4      | 47.1       | 45.9       | UM   | Prodiqy | LMO86 |
| 7      | A   | 1     | Control          |     | n  | n  | n  | n  | F   | White | No                 | 68  | 31.2 | 18.3 | 42.5      | 30.9      | 50.7       | 42.7       | UM   | Prodiqy | NYZ81 |
| 7      | A   | 2     | Control          |     | n  | n  | n  | n  | F   | White | No                 | 52  | 31.4 | 18.7 | 41.9      | 39.7      | 44.4       | 41.6       | UM   | Prodiqy | LUT53 |
| 7      | A   | 3     | Control          |     | n  | n  | n  | n  | F   | Black | No                 | 66  | 32.0 | 17.8 | 39.5      | 41.9      | 52.3       | 46.4       | UM   | Prodiqy | OP179 |
| 7      | A   | 4     | Control          |     | n  | n  | n  | n  | F   | White | No                 | 59  | 32.1 | 19.9 | 37.2      | 35.1      | 44.7       | 40.0       | UM   | Prodiqy | COH37 |
| 7      | A   | 5     | Control          |     | n  | n  | n  | n  | F   | Black | No                 | 58  | 32.1 | 18.8 | 39.2      | 39.5      | 47.2       | 42.7       | UM   | Prodiqy | DCF67 |
| 7      | A   | 6     | Control          |     | n  | n  | n  | n  | F   | White |                    | 46  | 32.2 | 16.2 | 48.3      | 49.6      | 55.5       | 51.1       | NIH  | iDXA    | PXU92 |
| 7      | B   | 1     | Control          |     | n  | n  | n  | n  | F   | White |                    | 40  | 32.3 | 18.7 | 39.7      | 37.5      | 47.5       | 42.0       | UM   | Prodiqy | ANV47 |
| 7      | B   | 2     | Control          |     | n  | n  | n  | n  | F   | White |                    | 40  | 32.3 | 18.2 | 38.2      | 38.8      | 48.6       | 43.6       | UM   | Prodiqy | KNX63 |

SUPPLEMENTARY DATA

| p. | Row | Col | Group   | Genetic comments | NMI | RB | RM | EO | BA | Sex | Race  | Hispanic or Latino | Age | BMI  | FFMI | Arms %fat | Legs %fat | Trunk %fat | Total %fat | Site | Table   | ID    |
|----|-----|-----|---------|------------------|-----|----|----|----|----|-----|-------|--------------------|-----|------|------|-----------|-----------|------------|------------|------|---------|-------|
| 7  | B   | 2   | Control |                  | n   | n  |    | n  | n  | F   | White |                    | 44  | 32.5 | 17.2 | 45.6      | 44.5      | 51.1       | 47.1       | UM   | Prodigy | RQK74 |
| 7  | B   | 3   | Control |                  | n   | n  |    | n  | n  | F   | White | No                 | 64  | 32.7 | 18.2 | 42.9      | 44.9      | 48.6       | 45.8       | UM   | Prodigy | XFY88 |
| 7  | B   | 4   | Control |                  | n   | n  |    | n  | n  | F   | White | No                 | 61  | 32.8 | 18.7 | 43.8      | 40.8      | 50.5       | 46.0       | UM   | Prodigy | STH18 |
| 7  | B   | 5   | Control |                  | n   | n  |    | n  | n  | F   | White | No                 | 63  | 33.6 | 18.7 | 39.6      | 41.1      | 51.4       | 45.9       | UM   | Prodigy | MRE71 |
| 7  | B   | 6   | Control |                  | n   | n  |    | n  | n  | F   | Black |                    | 27  | 33.9 | 17.6 | 42.5      | 51.3      | 48.5       | 47.9       | UM   | Prodigy | DLR23 |
| 7  | C   | 1   | Control |                  |     |    | n  | n  |    | F   | White |                    | 55  | 34.0 | 17.6 | 45.4      | 46.6      | 54.9       | 49.5       | NIH  | iDXA    | YHA27 |
| 7  | C   | 2   | Control |                  | n   | n  |    | n  | n  | F   | White |                    | 38  | 34.1 | 17.9 | 45.3      | 51.8      | 46.5       | 47.3       | UM   | Prodigy | SIG75 |
| 7  | C   | 3   | Control |                  | n   | n  |    | n  | n  | F   | White |                    | 30  | 34.3 | 17.1 | 41.7      | 53.2      | 51.6       | 50.1       | UM   | Prodigy | IVL26 |
| 7  | C   | 4   | Control |                  | n   | n  |    | n  | n  | F   | White |                    | 30  | 34.7 | 19.0 | 40.0      | 45.0      | 48.3       | 45.2       | UM   | Prodigy | PAU13 |
| 7  | C   | 5   | Control |                  | n   | n  |    | n  | n  | F   | White |                    | 60  | 34.8 | 18.6 | 47.8      | 53.1      | 46.9       | 48.3       | NIH  | iDXA    | VMX61 |
| 7  | C   | 6   | Control |                  | n   | n  |    | n  | n  | F   | White |                    | 56  | 35.9 | 16.6 | 52.4      | 56.2      | 57.6       | 54.9       | NIH  | iDXA    | XZI46 |
| 8  | A   | 1   | Control |                  | n   | n  |    | n  | n  | F   | White | No                 | 65  | 36.1 | 19.1 | 41.6      | 44.3      | 53.6       | 48.7       | UM   | Prodigy | HUD71 |
| 8  | A   | 2   | Control |                  | n   | n  |    | n  | n  | F   | White | No                 | 59  | 36.2 | 18.4 | 45.4      | 51.6      | 52.2       | 50.4       | UM   | Prodigy | GZS88 |
| 8  | A   | 3   | Control |                  | n   | n  |    | n  | n  | F   | White |                    | 39  | 36.2 | 21.8 | 32.0      | 39.6      | 43.2       | 39.8       | UM   | Prodigy | WGY35 |
| 8  | A   | 4   | Control |                  | n   | n  |    | n  | n  | F   | White |                    | 24  | 36.3 | 20.0 | 44.1      | 47.0      | 45.2       | 44.9       | UM   | Prodigy | LHU12 |
| 8  | A   | 5   | Control |                  | n   | n  |    | n  | n  | F   | White | No                 | 49  | 36.4 | 21.8 | 44.2      | 40.0      | 46.5       | 43.5       | UM   | Prodigy | FCG85 |
| 8  | A   | 6   | Control |                  | n   | n  |    | n  | n  | F   | White |                    | 37  | 36.4 | 19.0 | 43.7      | 40.5      | 54.8       | 47.8       | UM   | Prodigy | SAE10 |
| 8  | B   | 1   | Control |                  | n   | n  |    | n  | n  | F   | White |                    | 48  | 36.6 | 17.0 | 53.9      | 47.3      | 54.6       | 50.6       | NIH  | iDXA    | IGU10 |
| 8  | B   | 2   | Control |                  | n   | n  |    | n  | n  | F   | White |                    | 55  | 37.0 | 17.0 | 58.7      | 54.3      | 58.2       | 55.3       | NIH  | iDXA    | OET15 |
| 8  | B   | 3   | Control |                  | n   | n  |    | n  | n  | F   | Black |                    | 24  | 37.2 | 19.3 | 43.1      | 48.9      | 50.2       | 48.0       | UM   | Prodigy | WTY40 |
| 8  | B   | 4   | Control |                  | n   | n  |    | n  | n  | F   | White |                    | 35  | 38.1 | 20.1 | 48.9      | 48.1      | 51.2       | 48.6       | NIH  | iDXA    | UOX70 |
| 8  | B   | 5   | Control |                  | n   | n  |    | n  | n  | F   | White | Yes                | 20  | 38.3 | 19.3 | 52.9      | 48.8      | 52.2       | 49.8       | NIH  | iDXA    | GZO39 |
| 8  | B   | 6   | Control |                  | n   | n  |    | n  | n  | F   | White |                    | 48  | 38.4 | 20.2 | 51.2      | 47.5      | 52.1       | 49.2       | NIH  | iDXA    | NAC28 |
| 8  | C   | 1   | Control |                  | y   | y  |    | n  | n  | F   | White | No                 | 67  | 38.7 | 21.1 | 29.5      | 35.7      | 53.3       | 45.8       | UM   | Prodigy | JOL74 |
| 8  | C   | 2   | Control |                  | n   | n  |    | n  | n  | F   | White | No                 | 61  | 38.8 | 19.6 | 51.2      | 44.0      | 56.5       | 52.2       | UM   | Prodigy | SDW74 |
| 8  | C   | 3   | Control |                  | n   | n  |    | n  | n  | F   | White |                    | 36  | 39.1 | 18.5 | 52.0      | 44.5      | 60.2       | 53.0       | NIH  | iDXA    | WUJ60 |
| 8  | C   | 4   | Control |                  | n   | n  |    | n  | n  | F   | White |                    | 25  | 39.4 | 22.8 | 37.3      | 37.4      | 47.7       | 42.0       | UM   | Prodigy | IRZ78 |
| 8  | C   | 5   | Control |                  | n   | n  |    | n  | n  | F   | Asian |                    | 29  | 39.5 | 20.8 | 45.0      | 45.5      | 50.9       | 47.3       | UM   | Prodigy | PPF17 |
| 8  | C   | 6   | Control |                  | n   | n  |    | n  | n  | F   | White |                    | 27  | 39.5 | 18.4 | 49.0      | 55.9      | 56.1       | 54.1       | NIH  | iDXA    | VQT58 |
| 9  | A   | 1   | Control |                  | n   | n  |    | n  | n  | F   | Black |                    | 26  | 39.6 | 21.1 | 47.4      | 48.5      | 47.6       | 46.7       | UM   | Prodigy | BMK37 |
| 9  | A   | 2   | Control |                  | n   | n  |    | n  | n  | F   | White |                    | 42  | 39.6 | 18.4 | 55.6      | 53.6      | 56.7       | 54.3       | NIH  | iDXA    | CYX49 |
| 9  | A   | 3   | Control |                  | n   | n  |    | n  | n  | F   | White | No                 | 51  | 39.6 | 19.6 | 50.6      | 50.0      | 53.7       | 51.2       | UM   | Prodigy | PTP54 |
| 9  | A   | 4   | Control |                  | n   | n  |    | n  | n  | F   | White | No                 | 52  | 40.0 | 20.4 | 43.9      | 52.1      | 52.3       | 50.3       | UM   | Prodigy | FNB62 |
| 9  | A   | 5   | Control |                  | n   | n  |    | n  | n  | F   | White | No                 | 64  | 41.2 | 22.1 | 49.6      | 51.4      | 49.5       | 49.3       | UM   | Prodigy | VHH62 |
| 9  | A   | 6   | Control |                  | n   | n  |    | n  | n  | F   | White |                    | 51  | 41.3 | 20.9 | 52.9      | 46.4      | 53.9       | 50.3       | NIH  | iDXA    | HZY68 |
| 9  | B   | 1   | Control |                  | n   | n  |    | n  | n  | F   | Black | No                 | 61  | 41.3 | 21.9 | 41.7      | 52.3      | 50.4       | 49.1       | UM   | Prodigy | KBU80 |
| 9  | B   | 2   | Control |                  | n   | n  |    | n  | n  | F   | White |                    | 39  | 42.2 | 19.9 | 49.4      | 50.1      | 58.6       | 53.5       | NIH  | iDXA    | BR38  |
| 9  | B   | 3   | Control |                  | n   | n  |    | n  | n  | F   | White |                    | 52  | 42.4 | 21.0 | 51.9      | 53.6      | 52.4       | 51.7       | NIH  | iDXA    | GXH69 |
| 9  | B   | 4   | Control |                  | n   | n  |    | n  | n  | F   | White |                    | 38  | 42.4 | 19.8 | 49.1      | 56.3      | 55.4       | 54.0       | NIH  | iDXA    | PTE72 |
| 9  | B   | 5   | Control |                  | n   | n  |    | n  | n  | F   | White |                    | 50  | 42.5 | 21.4 | 46.1      | 45.2      | 57.0       | 51.0       | NIH  | iDXA    | TLI73 |
| 9  | B   | 6   | Control |                  | n   | n  |    | n  | n  | F   | White | No                 | 54  | 42.9 | 21.1 | 55.5      | 54.1      | 53.7       | 53.1       | UM   | Prodigy | ATB52 |
| 9  | C   | 1   | Control |                  | n   | n  |    | n  | n  | F   | White |                    | 41  | 43.0 | 19.5 | 53.2      | 52.0      | 60.8       | 55.5       | NIH  | iDXA    | PMK61 |
| 9  | C   | 2   | Control |                  | n   | n  |    | n  | n  | F   | White |                    | 53  | 44.3 | 21.0 | 48.4      | 48.9      | 59.6       | 53.4       | NIH  | iDXA    | UUY97 |

SUPPLEMENTARY DATA

| p. Row | Col | Group | Genetic comments | NMI | RB | RM | EO | BA | Sex | Race  | Hispanic or Latino | Age | BMI  | FFMI | Arms %fat | Legs %fat | Trunk %fat | Total %fat | Site | Table   | ID     |
|--------|-----|-------|------------------|-----|----|----|----|----|-----|-------|--------------------|-----|------|------|-----------|-----------|------------|------------|------|---------|--------|
| 9      | C   | 3     | Control          | n   | n  | n  | n  | n  | F   | White | Yes                | 19  | 44.3 | 20.9 | 54.1      | 54.3      | 56.9       | 54.3       | NIH  | iDXA    | ZR074  |
| 9      | C   | 4     | Control          | n   | y  |    |    |    | F   | White | No                 | 57  | 44.7 | 24.0 | 44.0      | 39.4      | 53.0       | 47.6       | UM   | Prodiqy | MTZ18  |
| 9      | C   | 5     | Control          | n   | n  | n  | n  | n  | F   | White |                    | 50  | 45.5 | 22.2 | 52.8      | 50.7      | 55.1       | 52.1       | NIH  | iDXA    | YQJ88  |
| 9      | C   | 6     | Control          | n   | n  | n  | n  | n  | F   | White |                    | 32  | 49.1 | 22.8 | 51.7      | 47.8      | 58.7       | 52.7       | NIH  | iDXA    | VUN71  |
| 10     | A   | 1     | Control          | n   | n  |    |    |    | M   | White |                    | 30  | 22.2 | 18.2 | 16.0      | 17.2      | 20.8       | 18.9       | UM   | Prodiqy | EJO49  |
| 10     | A   | 2     | Control          | n   | n  |    |    |    | M   | White |                    | 20  | 22.8 | 18.6 | 14.5      | 19.1      | 19.4       | 18.8       | UM   | Prodiqy | EWG59  |
| 10     | A   | 3     | Control          | n   | n  | n  | n  | n  | M   | White |                    | 62  | 23.5 | 19.4 | 19.5      | 21.0      | 17.4       | 19.1       | NIH  | iDXA    | WIU51  |
| 10     | A   | 4     | Control          | n   | n  | ?  | n  | n  | M   | White |                    | 64  | 24.4 | 19.1 | 17.9      | 21.7      | 26.5       | 23.4       | NIH  | iDXA    | LGD67  |
| 10     | A   | 5     | Control          | n   | n  | n  | n  | n  | M   | White |                    | 54  | 24.5 | 18.3 | 20.8      | 22.1      | 31.5       | 26.6       | NIH  | iDXA    | CBG29  |
| 10     | A   | 6     | Control          | n   | n  | n  | n  | n  | M   | White |                    | 48  | 24.8 | 18.6 | 20.7      | 27.6      | 27.4       | 26.4       | NIH  | iDXA    | WVT82  |
| 10     | B   | 1     | Control          | n   | n  | n  | n  | n  | M   | White |                    | 49  | 25.3 | 19.1 | 21.0      | 21.8      | 31.1       | 26.0       | NIH  | iDXA    | GLF38  |
| 10     | B   | 2     | Control          | n   | n  |    |    |    | M   | White | No                 | 65  | 27.1 | 19.3 | 22.8      | 25.3      | 36.4       | 30.7       | UM   | Prodiqy | BLC25  |
| 10     | B   | 3     | Control          | y   | y  |    |    |    | M   | White | No                 | 58  | 27.8 | 20.6 | 25.0      | 16.0      | 38.2       | 29.6       | UM   | Prodiqy | VGB36  |
| 10     | B   | 4     | Control          | n   | n  |    |    |    | M   | White | No                 | 65  | 28.5 | 19.1 | 25.5      | 25.9      | 39.1       | 32.8       | UM   | Prodiqy | AMK51  |
| 10     | B   | 5     | Control          | n   | y  |    |    |    | M   | White | No                 | 62  | 29.9 | 20.6 | 22.9      | 20.3      | 41.4       | 32.1       | UM   | Prodiqy | EVP48  |
| 10     | B   | 6     | Control          | n   | y  |    |    |    | M   | White | No                 | 67  | 29.9 | 19.7 | 30.7      | 26.1      | 42.3       | 35.4       | UM   | Prodiqy | YBG67  |
| 10     | C   | 1     | Control          | n   | n  | n  | n  | n  | M   | White |                    | 63  | 30.0 | 23.0 | 19.5      | 18.5      | 29.4       | 24.5       | NIH  | iDXA    | MEB58  |
| 10     | C   | 2     | Control          | n   | n  |    |    |    | M   | White | No                 | 60  | 30.1 | 20.2 | 24.3      | 27.7      | 40.4       | 33.4       | UM   | Prodiqy | TLP75  |
| 10     | C   | 3     | Control          | n   | y  |    |    |    | M   | White | No                 | 24  | 31.0 | 23.6 | 18.4      | 17.0      | 33.5       | 25.8       | UM   | Prodiqy | SNA53  |
| 10     | C   | 4     | Control          | n   | n  |    |    |    | M   | White |                    | 58  | 31.1 | 19.5 | 29.7      | 28.4      | 47.6       | 38.4       | UM   | Prodiqy | IBZY86 |
| 10     | C   | 5     | Control          | n   | y  |    |    |    | M   | Asian | No                 | 44  | 31.5 | 22.3 | 25.3      | 22.4      | 36.6       | 30.4       | UM   | Prodiqy | YBV41  |
| 10     | C   | 6     | Control          | n   | y  |    |    |    | M   | Black | No                 | 56  | 31.8 | 20.5 | 29.8      | 31.2      | 43.7       | 37.2       | UM   | Prodiqy | WJY11  |
| 11     | A   | 1     | Control          | y   | y  |    |    |    | M   | White | No                 | 55  | 32.5 | 22.3 | 24.3      | 24.7      | 38.7       | 32.6       | UM   | Prodiqy | MRP51  |
| 11     | A   | 2     | Control          | n   | n  |    |    |    | M   | White |                    | 60  | 32.6 | 20.3 | 31.4      | 33.7      | 44.3       | 38.4       | UM   | Prodiqy | XBS75  |
| 11     | A   | 3     | Control          | n   | n  |    |    |    | M   | White | No                 | 62  | 33.0 | 21.1 | 33.8      | 28.9      | 44.0       | 37.2       | UM   | Prodiqy | QOS38  |
| 11     | A   | 4     | Control          | y   | y  |    |    |    | M   | White | No                 | 52  | 33.1 | 23.6 | 25.7      | 20.4      | 37.8       | 30.3       | UM   | Prodiqy | JSP42  |
| 11     | A   | 5     | Control          | n   | n  |    |    |    | M   | Black |                    | 32  | 34.2 | 22.3 | 27.0      | 28.4      | 41.8       | 34.6       | UM   | Prodiqy | PZR33  |
| 11     | A   | 6     | Control          | n   | n  |    |    |    | M   | White | No                 | 64  | 35.5 | 20.3 | 32.4      | 33.8      | 50.0       | 43.4       | UM   | Prodiqy | LCL49  |
| 11     | B   | 1     | Control          | n   | n  |    |    |    | M   | White |                    | 24  | 35.6 | 22.3 | 31.7      | 29.3      | 44.2       | 37.1       | UM   | Prodiqy | NEX71  |
| 11     | B   | 2     | Control          | n   | n  |    |    |    | M   | Black |                    | 22  | 36.0 | 22.0 | 32.9      | 39.9      | 41.0       | 38.6       | UM   | Prodiqy | QVO22  |
| 11     | B   | 3     | Control          | n   | n  |    |    |    | M   | White | No                 | 65  | 36.1 | 20.1 | 35.4      | 42.0      | 50.5       | 45.2       | UM   | Prodiqy | MUW65  |
| 11     | B   | 4     | Control          | n   | n  |    |    |    | M   | White |                    | 35  | 36.4 | 21.0 | 36.1      | 34.7      | 49.1       | 42.3       | UM   | Prodiqy | AUL87  |
| 11     | B   | 5     | Control          | n   | n  |    |    |    | M   | White | No                 | 57  | 36.8 | 23.3 | 31.6      | 30.5      | 45.3       | 38.0       | UM   | Prodiqy | KQR47  |
| 11     | B   | 6     | Control          | n   | y  |    |    |    | M   | White | No                 | 44  | 37.6 | 22.8 | 32.4      | 32.9      | 46.8       | 40.0       | UM   | Prodiqy | TRV14  |
| 11     | C   | 1     | Control          | n   | n  |    |    |    | M   | White | No                 | 57  | 37.7 | 24.2 | 26.7      | 33.1      | 42.8       | 37.4       | UM   | Prodiqy | XUT61  |
| 11     | C   | 2     | Control          | n   | n  |    |    |    | M   | White | No                 | 62  | 40.4 | 23.9 | 31.6      | 37.8      | 45.1       | 41.0       | UM   | Prodiqy | HVL92  |
| 11     | C   | 3     | Control          | n   | n  |    |    |    | M   | White |                    | 47  | 40.9 | 22.9 | 34.4      | 37.3      | 52.6       | 45.0       | NIH  | iDXA    | BKD94  |
| 11     | C   | 4     | Control          | n   | n  |    |    |    | M   | White |                    | 64  | 41.0 | 27.1 | 30.5      | 26.6      | 42.8       | 35.1       | UM   | Prodiqy | KQO60  |
| 11     | C   | 5     | Control          | n   | n  |    |    |    | M   | White |                    | 44  | 41.7 | 24.1 | 39.2      | 32.1      | 52.7       | 44.1       | NIH  | iDXA    | IBA47  |
| 11     | C   | 6     | Control          | n   | n  |    |    |    | M   | White | No                 | 60  | 43.1 | 23.6 | 40.8      | 45.3      | 50.2       | 46.5       | UM   | Prodiqy | LAI54  |
| 12     | A   | 1     | CG1              |     |    |    |    |    | F   | White |                    | 33  | 16.8 | 15.7 | 9.4       | 7.2       | 4.2        | 6.9        | NIH  | iDXA    | VDF29  |
| 12     | A   | 2     | CG1              |     |    |    |    |    | F   | White | Yes                | 14  | 18.6 | 16.3 | 18.1      | 16.4      | 9.6        | 13.6       | NIH  | iDXA    | MCN25  |
| 12     | A   | 3     | CG1              |     |    |    |    |    | F   | White | Yes                | 33  | 18.7 | 17.2 | 13.4      | 8.9       | 6.7        | 9.3        | NIH  | iDXA    | IFF99  |

SUPPLEMENTARY DATA

| p. Row | Col | Group | Genetic comments      | NMI    | RB                                                                                   | RM | EO | BA | Sex | Race  | Hispanic or Latino | Age | BMI  | FFMI | Arms %fat | Legs %fat | Trunk %fat | Total %fat | Site | Table   | ID    |
|--------|-----|-------|-----------------------|--------|--------------------------------------------------------------------------------------|----|----|----|-----|-------|--------------------|-----|------|------|-----------|-----------|------------|------------|------|---------|-------|
| 12     | A   | 4     | CGL1                  | AGPAT2 |                                                                                      |    |    |    | F   | White |                    | 32  | 19.9 | 19.2 | 4.2       | 4.6       | 4.0        | 5.2        | NIH  | iDXA    | HSE26 |
| 12     | A   | 5     | CGL1                  | AGPAT2 |                                                                                      |    |    |    | F   | White | Yes                | 20  | 20.9 | 19.0 | 11.5      | 10.8      | 10.0       | 11.2       | NIH  | iDXA    | JRD21 |
| 12     | A   | 6     | CGL1                  | AGPAT2 |                                                                                      |    |    |    | F   | Black |                    | 20  | 25.4 | 23.7 | 7.0       | 7.8       | 6.8        | 7.5        | NIH  | iDXA    | VSH16 |
| 12     | B   | 1     | CGL1                  | AGPAT2 |                                                                                      |    |    |    | M   | Black |                    | 25  | 24.9 | 23.3 | 6.4       | 7.6       | 5.3        | 7.3        | NIH  | iDXA    | XHD64 |
| 12     | B   | 2     | CGL2                  |        | Presumed BSCL2. Gene sequence information not available                              |    |    |    | F   | White |                    | 14  | 18.2 | 17.1 | 10.8      | 8.0       | 6.3        | 8.4        | NIH  | iDXA    | VXI60 |
| 12     | B   | 3     | CGL2                  |        | BSCL2                                                                                |    |    |    | M   | Asian |                    | 16  | 16.6 | 15.4 | 11.1      | 10.0      | 6.0        | 9.0        | NIH  | iDXA    | UIW42 |
| 12     | B   | 4     | CGL2                  |        | BSCL2                                                                                |    |    |    | M   | White |                    | 18  | 24.2 | 22.9 | 6.4       | 8.1       | 5.3        | 7.2        | NIH  | iDXA    | GEW39 |
| 12     | B   | 5     | GL LMNA p.T10I-linked |        | LMNA p.T10I-Sahinoz et al (19), Hussain et al (20)                                   |    |    |    | F   | Black | No                 | 13  | 14.7 | 13.5 | 10.2      | 11.0      | 5.4        | 8.8        | UM   | Prodigy | QOI19 |
| 12     | B   | 6     | CGL PCYT1A-linked     |        | PCYT1A Payne et al (21)                                                              |    |    |    | F   | White |                    | 27  | 14.4 | 13.4 | 8.9       | 7.5       | 7.4        | 8.9        | NIH  | iDXA    | HKV51 |
| 12     | C   | 1     | AGL                   |        |                                                                                      |    |    |    | F   | White |                    | 40  | 17.0 | 16.0 | 12.1      | 7.3       | 4.5        | 7.3        | NIH  | iDXA    | PBN25 |
| 12     | C   | 2     | AGL                   |        |                                                                                      |    |    |    | F   | White | No                 | 19  | 21.3 | 20.0 | 5.7       | 6.6       | 5.1        | 6.7        | UM   | Prodigy | AFC45 |
| 12     | C   | 3     | AGL                   |        |                                                                                      |    |    |    | M   | White | Yes                | 20  | 18.8 | 17.8 | 7.4       | 7.4       | 4.3        | 6.8        | NIH  | iDXA    | FMN85 |
| 12     | C   | 4     | AGL                   |        |                                                                                      |    |    |    | M   | White | No                 | 15  | 19.2 | 13.3 | 6.1       | 9.1       | 6.7        | 8.4        | UM   | Prodigy | KAC12 |
| 13     | A   | 1     | FPLD2                 |        | LMNA, non-hotspot                                                                    |    |    |    | F   | White | No                 | 33  | 21.6 | 18.5 | 14.3      | 15.6      | 12.5       | 14.3       | UM   | Prodigy | ONR25 |
| 13     | A   | 2     | FPLD2                 |        | LMNA, non-hotspot                                                                    |    |    |    | F   | White | Yes                | 15  | 21.6 | 18.4 | 17.1      | 15.9      | 15.0       | 16.0       | NIH  | iDXA    | ZLX34 |
| 13     | A   | 3     | FPLD2                 |        | LMNA, non-hotspot Ajluni et al (8)                                                   |    |    |    | F   | White | No                 | 37  | 27.2 | 18.6 | 37.4      | 11.2      | 40.7       | 33.1       | UM   | Prodigy | DSC40 |
| 13     | A   | 4     | FPLD2                 |        | LMNA p.R482L Ajluni et al (22)                                                       |    |    |    | F   | White | No                 | 59  | 20.5 | 15.8 | 16.8      | 14.4      | 30.6       | 23.8       | UM   | Prodigy | GZA67 |
| 13     | A   | 5     | FPLD2                 |        | LMNA p.R482L Ajluni et al (22)                                                       |    |    |    | F   | White | No                 | 30  | 31.8 | 25.1 | 21.6      | 16.2      | 26.4       | 22.7       | UM   | Prodigy | ILQ65 |
| 13     | A   | 6     | FPLD2                 |        | LMNA p.R482Q Ajluni et al (8)                                                        |    |    |    | F   | White |                    | 59  | 21.9 | 17.1 | 17.5      | 14.4      | 29.3       | 23.5       | UM   | Prodigy | VFQ93 |
| 13     | B   | 1     | FPLD2                 |        | LMNA p.R482Q Ajluni et al (22)                                                       |    |    |    | F   | White |                    | 55  | 22.7 | 17.1 | 20.9      | 20.1      | 32.4       | 27.3       | UM   | Prodigy | WQF13 |
| 13     | B   | 2     | FPLD2                 |        | LMNA p.R482Q Ajluni et al (8)                                                        |    |    |    | F   | White | No                 | 42  | 24.0 | 19.7 | 15.5      | 16.8      | 25.1       | 21.4       | UM   | Prodigy | PLU27 |
| 13     | B   | 3     | FPLD2                 |        | LMNA p.R482Q Ajluni et al (22)                                                       |    |    |    | F   | White | No                 | 49  | 24.5 | 17.6 | 24.7      | 17.8      | 38.4       | 29.8       | UM   | Prodigy | FAM92 |
| 13     | B   | 4     | FPLD2                 |        | LMNA p.R482Q Ajluni et al (8)                                                        |    |    |    | F   | White | No                 | 57  | 24.9 | 19.6 | 15.0      | 12.8      | 29.6       | 22.9       | UM   | Prodigy | OZF80 |
| 13     | B   | 5     | FPLD2                 |        | LMNA p.R482Q Ajluni et al (8)                                                        |    |    |    | F   | White |                    | 49  | 25.3 | 18.7 | 22.6      | 17.6      | 34.2       | 27.5       | UM   | Prodigy | BIA63 |
| 13     | B   | 6     | FPLD2                 |        | LMNA p.R482Q Ajluni et al (22)                                                       |    |    |    | F   | White |                    | 40  | 29.9 | 20.8 | 24.7      | 22.8      | 37.4       | 31.2       | UM   | Prodigy | VKF34 |
| 13     | C   | 1     | FPLD2                 |        | LMNA p.R482Q Ajluni et al (22)                                                       |    |    |    | F   | White |                    | 40  | 32.9 | 21.6 | 28.5      | 24.4      | 43.7       | 36.0       | UM   | Prodigy | ZYS55 |
| 13     | C   | 2     | FPLD2                 |        | LMNA p.R482Q                                                                         |    |    |    | F   | White | No                 | 30  | 33.6 | 24.8 | 22.4      | 21.3      | 29.8       | 26.4       | UM   | Prodigy | TSI97 |
| 13     | C   | 3     | FPLD2                 |        | LMNA p.R482Q Ajluni et al (22)                                                       |    |    |    | F   | White | No                 | 62  | 38.1 | 23.1 | 31.9      | 30.5      | 46.5       | 40.0       | UM   | Prodigy | SZK30 |
| 13     | C   | 4     | FPLD2                 |        | LMNA p.R482W                                                                         |    |    |    | F   | White |                    | 38  | 23.8 | 20.7 | 13.6      | 10.8      | 16.1       | 14.7       | NIH  | iDXA    | VHI21 |
| 13     | C   | 5     | FPLD2                 |        | LMNA p.R482W Ajluni et al (8)                                                        |    |    |    | F   | White | No                 | 41  | 26.1 | 19.9 | 22.7      | 18.7      | 28.6       | 25.3       | UM   | Prodigy | BBB10 |
| 13     | C   | 6     | FPLD2                 |        | LMNA p.R482W                                                                         |    |    |    | F   | White |                    | 19  | 26.6 | 20.7 | 22.7      | 16.5      | 26.8       | 23.1       | NIH  | iDXA    | NXH65 |
| 14     | A   | 1     | FPLD2                 |        | LMNA, non-hotspot                                                                    |    |    |    | F   | White | No                 | 58  | 23.2 | 18.3 | 14.6      | 18.4      | 25.3       | 22.0       | UM   | Prodigy | OBM76 |
| 14     | A   | 2     | FPLD2                 |        | LMNA, non-hotspot Ajluni et al (22)                                                  |    |    |    | F   | White | No                 | 45  | 27.7 | 18.8 | 27.4      | 19.4      | 39.9       | 32.5       | UM   | Prodigy | YZM31 |
| 14     | A   | 3     | FPLD2                 |        | LMNA, non-hotspot Ajluni et al (8)                                                   |    |    |    | F   | White | No                 | 33  | 19.8 | 15.4 | 22.8      | 14.1      | 31.3       | 24.7       | UM   | Prodigy | GUX67 |
| 14     | A   | 4     | FPLD2                 |        | LMNA, variant to be verified                                                         |    |    |    | F   | White |                    | 18  | 26.5 | 20.7 | 19.8      | 17.0      | 26.7       | 22.7       | NIH  | iDXA    | XBM73 |
| 14     | A   | 5     | FPLD2                 |        | LMNA p.R482Q                                                                         |    |    |    | M   | White | No                 | 49  | 37.8 | 27.8 | 25.7      | 18.3      | 32.9       | 27.3       | UM   | Prodigy | ZRZ36 |
| 15     | A   | 1     | FPLDX                 |        | PPARG p.A261V, FPLD3 by OMIM, MITER probability of pathogenicity=65.7%, Ajluni et al |    |    |    | n   | White |                    | 64  | 31.7 | 19.9 | 33.5      | 30.8      | 44.8       | 38.5       | UM   | Prodigy | GEJ25 |
| 15     | A   | 2     | FPLDX                 |        | PPARG p.G161V, FPLD3 by OMIM, MITER probability of pathogenicity=99.7%               |    |    |    | n   | White | Yes                | 34  | 25.9 | 20.0 | 24.7      | 22.5      | 26.7       | 24.9       | UM   | Prodigy | CHD38 |
| 15     | A   | 3     | FPLDX                 |        | PPARG, FPLD3 by OMIM                                                                 |    |    |    | F   | White |                    | 27  | 23.6 | 18.6 | 19.5      | 13.0      | 28.1       | 22.5       | NIH  | iDXA    | QGS50 |
| 15     | A   | 4     | FPLDX                 |        | PPARG, FPLD3 by OMIM                                                                 |    |    |    | F   | White |                    | 54  | 24.2 | 17.4 | 24.4      | 18.3      | 37.3       | 29.6       | NIH  | iDXA    | LTP90 |

SUPPLEMENTARY DATA

| p. Row | Col | Group | Genetic comments                                                        | NMI | RB | RM | EO | BA | Sex | Race  | Hispanic or Latino | Age | BMI  | FFMI | Arms %fat | Legs %fat | Trunk %fat | Total %fat | Site       | Table | ID |
|--------|-----|-------|-------------------------------------------------------------------------|-----|----|----|----|----|-----|-------|--------------------|-----|------|------|-----------|-----------|------------|------------|------------|-------|----|
| 15A    | 5   | FPLDX | PPARG, FPLD3 by OMIM                                                    | y   | y  | y  | y  | y  | F   | White |                    | 51  | 28.6 | 17.9 | 39.5      | 27.2      | 40.3       | 35.7       | NIH iDXA   | XNN72 |    |
| 15A    | 6   | FPLDX | PPARG, p.E352K, FPLD3 by OMIM, MITER probability of pathogenicity=98.2% | y   | y  |    |    | n  | M   | White | No                 | 52  | 28.4 | 22.9 | 15.5      | 18.8      | 23.1       | 20.9       | UM Prodigy | WDA15 |    |
| 15B    | 1   | FPLDX | POLD1 p.E1067K Ajluni et al (8)                                         | n   | n  |    |    | y  | F   | White | Yes                | 34  | 17.6 | 15.5 | 15.6      | 7.9       | 15.4       | 12.7       | UM Prodigy | IGX98 |    |
| 15B    | 2   | FPLDX | POLD1 p.E1067K Ajluni et al (8)                                         |     |    |    |    |    | F   | White | Yes                | 14  | 18.3 | 15.2 | 25.0      | 16.0      | 22.4       | 19.9       | UM Prodigy | IDI83 |    |
| 15B    | 3   | FPLDX |                                                                         |     |    |    |    |    | F   | White | No                 | 12  | 17.7 | 14.2 | 18.1      | 13.0      | 25.9       | 21.0       | UM Prodigy | IDY52 |    |
| 15B    | 4   | FPLDX |                                                                         | y   | y  |    |    | n  | F   | White | No                 | 54  | 24.0 | 15.5 | 36.9      | 30.6      | 41.4       | 36.9       | UM Prodigy | CES33 |    |
| 15B    | 5   | FPLDX |                                                                         | y   | y  | y  | y  | n  | F   | White | No                 | 45  | 26.0 | 19.0 | 30.0      | 23.0      | 30.6       | 28.1       | NIH iDXA   | NLA27 |    |
| 15B    | 6   | FPLDX |                                                                         | y   | y  | y  | y  | y  | F   | White |                    | 47  | 26.7 | 18.2 | 28.6      | 19.7      | 41.4       | 33.1       | NIH iDXA   | CFT80 |    |
| 15C    | 1   | FPLDX |                                                                         |     |    |    |    |    | F   | White |                    | 16  | 26.8 | 17.8 | 26.0      | 22.9      | 44.4       | 34.8       | NIH iDXA   | PWR43 |    |
| 15C    | 2   | FPLDX |                                                                         | n   | y  |    |    | n  | F   | White | No                 | 45  | 27.0 | 18.1 | 29.0      | 24.4      | 41.5       | 34.4       | UM Prodigy | PKT82 |    |
| 15C    | 3   | FPLDX |                                                                         | y   | y  |    |    | y  | F   | White | No                 | 33  | 27.8 | 17.1 | 35.0      | 23.8      | 48.0       | 39.8       | UM Prodigy | MTJ87 |    |
| 15C    | 4   | FPLDX |                                                                         | y   | y  |    |    | y  | F   | White | No                 | 63  | 28.0 | 15.6 | 42.7      | 31.4      | 54.4       | 45.7       | UM Prodigy | ECD84 |    |
| 15C    | 5   | FPLDX |                                                                         | y   | y  |    |    | y  | F   | Black |                    | 23  | 30.2 | 24.5 | 17.7      | 11.6      | 25.3       | 20.4       | UM Prodigy | ZQB70 |    |
| 15C    | 6   | FPLDX |                                                                         | y   | y  | y  | y  | y  | F   | White |                    | 41  | 30.3 | 18.9 | 38.5      | 19.8      | 46.8       | 38.5       | NIH iDXA   | YSD77 |    |
| 16A    | 1   | FPLDX |                                                                         |     |    |    |    |    | F   | White | No                 | 13  | 30.5 | 19.7 | 37.9      | 31.0      | 42.4       | 37.5       | UM Prodigy | GFV67 |    |
| 16A    | 2   | FPLDX |                                                                         | n   | n  |    |    | n  | F   | White | No                 | 63  | 30.7 | 18.3 | 41.3      | 30.6      | 48.9       | 42.4       | UM Prodigy | NEG22 |    |
| 16A    | 3   | FPLDX |                                                                         | y   | y  |    |    | y  | F   | White | No                 | 58  | 31.0 | 17.0 | 37.1      | 28.4      | 54.6       | 46.1       | UM Prodigy | EQN50 |    |
| 16A    | 4   | FPLDX |                                                                         | n   | n  | n  | n  | n  | F   | White | No                 | 54  | 31.0 | 17.2 | 43.0      | 37.1      | 51.3       | 44.9       | NIH iDXA   | UTU82 |    |
| 16A    | 5   | FPLDX |                                                                         | y   | y  |    |    | y  | F   | White | No                 | 58  | 31.0 | 20.6 | 32.7      | 24.9      | 40.6       | 34.7       | UM Prodigy | XOQ50 |    |
| 16A    | 6   | FPLDX |                                                                         | y   | y  |    |    | y  | F   | White | No                 | 39  | 31.1 | 21.2 | 36.9      | 26.2      | 38.4       | 33.6       | UM Prodigy | TSZ36 |    |
| 16B    | 1   | FPLDX |                                                                         | y   | y  | y  | y  | y  | F   | White |                    | 29  | 31.6 | 19.8 | 36.9      | 23.4      | 47.9       | 38.9       | NIH iDXA   | YGE23 |    |
| 16B    | 2   | FPLDX |                                                                         |     |    |    |    |    | F   | White | No                 | 57  | 32.1 | 17.0 | 45.5      | 35.1      | 56.5       | 48.7       | UM Prodigy | AFP45 |    |
| 16B    | 3   | FPLDX |                                                                         | y   | y  |    |    | y  | F   |       | No                 | 51  | 33.7 | 18.9 | 29.1      | 28.9      | 52.5       | 44.3       | UM Prodigy | BPZ32 |    |
| 16B    | 4   | FPLDX |                                                                         | y   | y  |    |    | y  | F   | White | No                 | 53  | 35.8 | 22.5 | 36.6      | 28.9      | 43.4       | 37.9       | UM Prodigy | MDW89 |    |
| 16B    | 5   | FPLDX |                                                                         | y   | y  |    |    | y  | F   | Other | Yes                | 65  | 37.0 | 24.1 | 33.8      | 27.2      | 39.7       | 34.7       | UM Prodigy | RNQ70 |    |
| 16B    | 6   | FPLDX |                                                                         | y   | y  | y  | y  | y  | F   | White | No                 | 39  | 37.8 | 21.1 | 37.9      | 26.3      | 54.8       | 45.0       | NIH iDXA   | CLR70 |    |
| 16C    | 1   | FPLDX |                                                                         |     |    |    |    |    | F   | White | No                 | 45  | 38.2 | 24.3 | 39.5      | 22.2      | 45.7       | 38.2       | UM Prodigy | GKC43 |    |
| 16C    | 2   | FPLDX |                                                                         | y   | y  |    |    | y  | F   | White | No                 | 55  | 38.7 | 20.7 | 45.1      | 34.3      | 55.0       | 47.0       | UM Prodigy | LAM96 |    |
| 16C    | 3   | FPLDX |                                                                         | y   | y  |    |    | n  | F   | White | No                 | 34  | 38.8 | 25.2 | 28.6      | 24.6      | 44.1       | 36.8       | UM Prodigy | EYO66 |    |
| 16C    | 4   | FPLDX |                                                                         | n   | n  |    |    | n  | F   | White | No                 | 32  | 40.9 | 22.2 | 41.0      | 34.0      | 51.6       | 46.0       | UM Prodigy | VKN31 |    |
| 16C    | 5   | FPLDX |                                                                         | n   | y  | ?  | ?  | n  | M   | White |                    | 65  | 26.0 | 20.0 | 20.5      | 19.2      | 28.3       | 24.1       | NIH iDXA   | TGQ88 |    |
| 16C    | 6   | FPLDX |                                                                         | y   | y  | y  | y  | n  | M   | White |                    | 46  | 32.1 | 25.3 | 13.5      | 13.4      | 30.2       | 22.7       | NIH iDXA   | LQP70 |    |
| 17A    | 1   | FPLDX |                                                                         | n   | y  |    |    | y  | M   | White | No                 | 62  | 32.9 | 20.5 | 29.1      | 24.1      | 50.4       | 39.5       | UM Prodigy | QNT60 |    |
| 17A    | 2   | FPLDX |                                                                         | y   | y  |    |    | y  | M   | White | No                 | 38  | 33.1 | 22.7 | 28.3      | 21.6      | 39.5       | 33.0       | UM Prodigy | EYC46 |    |
| 17A    | 3   | FPLDX |                                                                         | n   | n  |    |    | n  | M   | White | No                 | 34  | 34.0 | 20.5 | 33.4      | 29.0      | 47.0       | 40.7       | UM Prodigy | NSF35 |    |
| 18A    | 1   | APL   |                                                                         |     |    |    |    |    | F   | White | No                 | 40  | 29.5 | 20.8 | 14.5      | 35.3      | 31.5       | 31.0       | UM Prodigy | FTR25 |    |
| 18A    | 2   | APL   |                                                                         |     |    |    |    |    | M   | White | No                 | 24  | 24.0 | 20.7 | 5.1       | 17.9      | 14.8       | 14.5       | UM Prodigy | WHI47 |    |

## References

1. Ozer F, Lichtenstein J, Kwiterovich P, McKusick V: A new genetic variety of lipodystrophy. *Clin Res* 1973;21:533
2. Dunnigan M, Cochrane M, Kelly A, Scott J: Familial lipotrophic diabetes with dominant transmission: a new syndrome. *QJM: An International Journal of Medicine* 1974;43:33-48
3. Köbberling J, Dunnigan M: Familial partial lipodystrophy: two types of an X linked dominant syndrome, lethal in the hemizygous state. *Journal of medical genetics* 1986;23:120-127
4. Cao H, Hegele RA: Nuclear lamin A/C R482Q mutation in Canadian kindreds with Dunnigan-type familial partial lipodystrophy. *Human molecular genetics* 2000;9:109-112
5. Speckman RA, Garg A, Du F, Bennett L, Veile R, Arioglu E, Taylor SI, Lovett M, Bowcock AM: Mutational and haplotype analyses of families with familial partial lipodystrophy (Dunnigan variety) reveal recurrent missense mutations in the globular C-terminal domain of lamin A/C. *The American Journal of Human Genetics* 2000;66:1192-1198
6. Hegele R: LMNA mutation position predicts organ system involvement in laminopathies. *Clinical genetics* 2005;68:31-34
7. Garg A, Vinaitheerthan M, Weatherall PT, Bowcock AM: Phenotypic heterogeneity in patients with familial partial lipodystrophy (Dunnigan variety) related to the site of missense mutations in lamin A/C gene. *The Journal of Clinical Endocrinology & Metabolism* 2001;86:59-65
8. Ajluni N, Meral R, Neidert AH, Brady GF, Buras E, McKenna B, DiPaola F, Chenevert TL, Horowitz JF, Buggs-Saxton C, Rupani AR, Thomas PE, Tayeh MK, Innis JW, Omary MB, Conjeevaram H, Oral EA: Spectrum of disease associated with partial lipodystrophy: lessons from a trial cohort. *Clin Endocrinol (Oxf)* 2017;86:698-707
9. Agarwal AK, Garg A: A novel heterozygous mutation in peroxisome proliferator-activated receptor- $\gamma$  gene in a patient with familial partial lipodystrophy. *The Journal of Clinical Endocrinology & Metabolism* 2002;87:408-408
10. George S, Rochford JJ, Wolfrum C, Gray SL, Schinner S, Wilson JC, Soos MA, Murgatroyd PR, Williams RM, Acerini CL, Dunger DB, Barford D, Umpleby AM, Wareham NJ, Davies HA, Schafer AJ, Stoffel M, O'Rahilly S, Barroso I: A family with severe insulin resistance and diabetes due to a mutation in AKT2. *Science* 2004;304:1325-1328
11. Rubio-Cabezas O, Puri V, Murano I, Saudek V, Semple RK, Dash S, Hyden CS, Bottomley W, Vigouroux C, Magré J, Raymond-Barker P, Murgatroyd PR, Chawla A, Skepper JN, Chatterjee VK, Suliman S, Consortium LS, Patch AM, Agarwal AK, Garg A, Barroso I, Cinti S, Czech MP, Argente J, O'Rahilly S, Savage DB: Partial lipodystrophy and insulin resistant diabetes in a patient with a homozygous nonsense mutation in CIDEC. *EMBO molecular medicine* 2009;1:280-287
12. Gandotra S, Le Dour C, Bottomley W, Cervera P, Giral P, Reznik Y, Charpentier G, Auclair M, Delépine M, Barroso I, Semple RK, Lathrop M, Lascols O, Capeau J, O'Rahilly S, Magré J, Savage DB, Vigouroux C: Perilipin deficiency and autosomal dominant partial lipodystrophy. *New England Journal of Medicine* 2011;364:740-748
13. Carboni N, Brancati F, Cocco E, Solla E, D'apice MR, Mateddu A, McIntyre A, Fadda E, Mura M, Lattanzi G, Piras R, Maioli MA, Marrosu G, Novelli G, Marrosu MG, Hegele RA: Partial lipodystrophy associated with muscular dystrophy of unknown genetic origin. *Muscle & nerve* 2014;49:928-930
14. Farhan SM, Robinson JF, McIntyre AD, Marrosu MG, Ticca AF, Loddo S, Carboni N, Brancati F, Hegele RA: A novel LIPE nonsense mutation found using exome sequencing in siblings with late-onset familial partial lipodystrophy. *Canadian Journal of Cardiology* 2014;30:1649-1654
15. Lotta LA, Gulati P, Day FR, Payne F, Ongen H, van de Bunt M, Gaulton KJ, Eicher JD, Sharp SJ, Luan J, De Lucia Rolfe E, Stewart ID, Wheeler E, Willems SM, Adams C, Yaghoobkar H, Consortium EP-I, Cambridge FC, Forouhi NG, Khaw KT, Johnson AD, Semple RK, Frayling T, Perry JR, Dermizakis E, McCarthy MI, Barroso I, Wareham NJ, Savage DB, Langenberg C, O'Rahilly S, Scott RA: Integrative genomic analysis implicates limited peripheral adipose storage capacity in the pathogenesis of human insulin resistance. *Nat Genet* 2017;49:17-26
16. Majithia AR, Tsuda B, Agostini M, Gnanapradeepan K, Rice R, Peloso G, Patel KA, Zhang X, Broekema MF, Patterson N, DUBY M, Sharpe T, Kalkhoven E, Rosen ED, Barroso I, Ellard S, Consortium UMD, Kathiresan S, Consortium MIG, O'Rahilly S, Consortium UCL, Chatterjee K, Florez JC, Mikkelsen T, Savage DB, Altshuler D: Prospective functional classification of all possible missense variants in PPARG. *Nature genetics* 2016;48:1570
17. Köbberling J, Willms B, Katterman R, Creutzfeldt W: Diabetes mellitus und familiäre, partielle lipotrophie. *Diabetes mellitus* 1971;2:427-430
18. Köbberling J, Willms B, Kattermann R, Creutzfeldt W: Lipodystrophy of the extremities. A dominantly inherited syndrome associated with lipotrophic diabetes. *Human Genetics* 1975;29:111-120
19. Sahinoz M, Khairi S, Cuttitta A, Brady GF, Rupani A, Meral R, Tayeh MK, Thomas P, Riebschlegler M, Camelo-Piragua S, Innis JW, Bishr Omary M, Michele DE, Oral EA: Potential association of LMNA-associated generalized lipodystrophy with juvenile dermatomyositis. *Clin Diabetes Endocrinol* 2018;4:6
20. Hussain I, Patni N, Ueda M, Sorkina E, Valerio CM, Cochran E, Brown RJ, Peeden J, Tikhonovich Y, Tiulpakov A, Stender SRS, Klouda E, Tayeh MK, Innis JW, Meyer A, Lal P, Godoy-Matos AF, Teles MG, Adams-Huet B, Rader DJ, Hegele RA, Oral EA, Garg A: A Novel Generalized Lipodystrophy-Associated Progeroid Syndrome Due to Recurrent Heterozygous LMNA p.T10I Mutation. *J Clin Endocrinol Metab* 2018;103:1005-1014
21. Payne F, Lim K, Grousse A, Brown RJ, Kory N, Robbins A, Xue Y, Sleigh A, Cochran E, Adams C, Dev Borman A, Russel-Jones D, Gorden P, Semple RK, Saudek V, O'Rahilly S, Walther TC, Barroso I, Savage DB: Mutations disrupting the Kennedy phosphatidylcholine pathway in humans with congenital lipodystrophy and fatty liver disease. *Proc Natl Acad Sci U S A* 2014;111:8901-8906
22. Ajluni N, Dar M, Xu J, Neidert AH, Oral EA: Efficacy and Safety of Metreleptin in Patients with Partial Lipodystrophy: Lessons from an Expanded Access Program. *J Diabetes Metab* 2016;7
